# DiSCERN - Deep Single Cell Expression ReconstructioN for improved cell clustering and cell subtype and state detection.

Fabian Hausmann<sup>a,b,1</sup>, Can Ergen-Behr<sup>a,1</sup>, Robin Khatri<sup>a,b</sup>, Mohamed Marouf<sup>a</sup>, Sonja Hänzelmann<sup>a,b</sup>, Rajasree Menon<sup>f</sup>, Matthias Kretzler<sup>f</sup>, Nicola Gagliani<sup>c,d,e</sup>, Samuel Huber<sup>c,d</sup>, Pierre Machart<sup>a,b,\*</sup>, Stefan Bonn<sup>a,b,\*</sup>

<sup>a</sup>*Institute of Medical Systems Biology, University Medical Center Hamburg-Eppendorf, Hamburg, Germany.*

<sup>b</sup>*Center for Biomedical AI, University Medical Center Hamburg-Eppendorf, Hamburg, Germany.*

<sup>c</sup>*Section of Molecular Immunology and Gastroenterology, I. Department of Medicine, University Medical Center Hamburg-Eppendorf, 20246 Hamburg, Germany*

<sup>d</sup>*Hamburg Center for Translational Immunology (HCTI), University Medical Center Hamburg-Eppendorf, 20246 Hamburg, Germany*

<sup>e</sup>*Department of General, Visceral and Thoracic Surgery, University Medical Center Hamburg-Eppendorf, 20246 Hamburg, Germany*

<sup>f</sup>*Department of Computational Medicine and Bioinformatics, University of Michigan, 500 S. State Street, Ann Arbor, 48109, Michigan, USA*

---

## Abstract

Single cell sequencing provides detailed insights into biological processes including cell differentiation and identity. While providing deep cell-specific information, the method suffers from technical constraints, most notably a limited number of expressed genes per cell, which leads to suboptimal clustering and cell type identification. Here we present DISCERN, a novel deep generative network that reconstructs missing single cell gene expression using a reference dataset. DISCERN outperforms competing algorithms in expression inference resulting in greatly improved cell clustering, cell type and activity detection, and insights into the cellular regulation of disease. We used DISCERN to detect two novel COVID-19-associated T cell types, cytotoxic CD4<sup>+</sup> and CD8<sup>+</sup> Tc2 T helper cells, with a potential role in adverse disease outcome. We utilized T cell fraction information of patient blood to classify mild or severe COVID-19 with an AUROC of 81 % that can serve as a biomarker of disease stage. DISCERN can be easily integrated into existing single cell sequencing workflows and readily adapted to enhance various other biomedical data types.

*Keywords:* Single cell RNA-seq, RNA sequencing, imputation, cell clustering,

---

\*Corresponding authors

*Email addresses:* [pierre.machart@neclab.eu](mailto:pierre.machart@neclab.eu) (Pierre Machart), [sbonn@uke.de](mailto:sbonn@uke.de) (Stefan Bonn)

<sup>1</sup>Authors contributed equally

cell type identification, expression reconstruction, Deep Learning, Machine Learning, auto encoder, batch effect correction, transfer learning, probabilistic modeling, reference atlas mapping, COVID-19, T helper cell, transcription factor analysis, single nuclear RNA-seq  
*2010 MSC:* 00-01, 99-00

---

## 1 **1. Introduction**

2 Single-cell RNA sequencing (scRNA-seq) technologies allow the dissection  
3 of gene expression at single-cell resolution, which improves the detection of  
4 known and novel cell types and the understanding of cell-specific molecular  
5 processes [1, 2]. The extension of the basic scRNA-seq technology with epitope  
6 sequencing of cell-surface protein levels (CITE-seq), allows for the simultaneous  
7 surveillance of the gene and protein surface expression of a cell [3]. Another  
8 recent technological innovation was TCR-seq, which enables the simultaneous  
9 sequencing of essential immune cell features and the variable segments of T cell  
10 antigen receptors (TCRs) that confer antigen specificity ([4, 5]).

11 While several commercial platforms have enabled researchers to use single  
12 cell sequencing methods with relative ease and at reasonable cost, the analysis  
13 of the high-dimensional scRNA-seq data still remains challenging [6, 7]. The  
14 main technical downside of single cell sequencing that impedes downstream  
15 analysis is the sparsity of gene expression information and high technical noise.  
16 Depending on the platform used, single cell sequencing detects around three  
17 thousand genes per cell, giving almost an order of magnitude less genes detected  
18 than bulk RNA-sequencing [8]. The term ‘dropout’ refers to genes that are  
19 expressed by a cell but cannot be observed in the corresponding scRNA-seq  
20 data, a technical artifact that afflicts predominantly lowly to medium expressed  
21 genes, as their transcript number is insufficient to reliably capture and amplify  
22 them. This missing expression information limits the resolution of downstream  
23 analyses, such as cell clustering, differential expression, marker gene and cell  
24 type identification [9].

25 To improve the lack and stochasticity of gene expression information in single  
26 cell experiments, several *in silico* gene imputation methods have been designed  
27 based on different principles. Gene imputation infers gene expression in a given  
28 cell type or state, based on the information from other biologically similar cells  
29 of the same dataset. Several methods utilizing this principle have been devel-  
30 oped [10], amongst them DCA, MAGIC, and scImpute [11, 12, 13]. DCA is  
31 an autoencoder-based method for denoising and imputation of scRNA-seq data  
32 using a zero-inflated negative binomial model of the gene expression. MAGIC  
33 uses a nearest neighbor diffusion graph to impute gene expression and scImpute  
34 estimates gene expression and drop-out probabilities using linear regression. All  
35 of these algorithms use information from similar cells with measured expression  
36 of the same dataset for imputation. Another class of imputation algorithms use  
37 bulk RNA-seq data to constrain scRNA-seq expression imputation. BfImpute  
38 [14] uses Bayesian factorization, SCRABBLE [15] matrix regularization, and

39 SIMPLEs [16] a prior distribution on the bulk data to impute scRNA-seq ex-  
40 pression. Unfortunately, SCRABBLE and Bfimpute do not scale beyond small  
41 single cell datasets and few genes (3000 cells and genes in our hands), and  
42 SIMPLEs requires matching single cell and bulk RNA-seq samples, severely  
43 constraining their usability.

44 Similarly, multigrade[17], BABEL [18], and Cross Modal Autoencoders[19]  
45 use scRNA-seq in combination with complementary, matching data (e.g. CITE-  
46 seq, ATAC-seq) to improve imputation. While complementary CITE-seq infor-  
47 mation is available for many scRNA-seq datasets, other information such as  
48 ATAC-seq data of the same sample is usually missing, which severely constrains  
49 the usability of BABEL and Cross Modal Autoencoder.

50 While current imputation methods provide improved gene expression infor-  
51 mation, they still rely on the comparison of similar cells with largely absent gene  
52 expression information, for example by using clustering approaches. Genes that  
53 are not expressed in neighboring cells cannot be imputed, limiting the value of  
54 classical imputation. In an ideal case, it would be possible to obtain information  
55 of the expected true gene expression per cell, or at least expression information  
56 with less technical noise, to reconstruct the true expression at single cell level.

57 Recent work has shown the effectiveness of deep generative models (e.g. Au-  
58 toencoders and Generative Adversarial Networks) to infer realistic scRNA-seq  
59 data and augment scarce cell populations using Generative Adversarial Net-  
60 works [20] or the prediction of perturbation response using Autoencoders [21].  
61 We hypothesized that a deep generative model could allow for the reconstruc-  
62 tion of missing single cell gene expression information (low quality - lq) by using  
63 related data with more genes expressed (high-quality - hq) as a reference, a com-  
64 pletely novel approach to gene expression inference (Figure 1A). In other words,  
65 lq data with many missing gene expression values and bad clustering could be  
66 transformed into data with few missing genes and improved clustering if the  
67 “style” of a related hq dataset could be transferred to it. In the best case,  
68 it would be possible to infer gene expression information for single cell data  
69 (lq) by using purified bulk RNA-seq data (hq), obtaining over ten thousand  
70 genes expressed per cell. We envision that this novel approach, when properly  
71 calibrated, is transformative for the analysis of single cell data, gaining deep  
72 mechanistic insights into data beyond what is currently measurable. It is im-  
73 portant to note that the concept of using hq data to reconstruct gene expression  
74 in lq data is fundamentally different from classical imputation algorithms that  
75 infer gene expression based on nearby cells from the same dataset, as outlined  
76 above.

77 Based on the above considerations, we developed DISCERN, a novel deep  
78 generative neural network for directed single cell expression reconstruction. DIS-  
79 CERN allows for the realistic reconstruction of gene expression information by  
80 transferring the style of hq data onto lq data, in latent and gene space. Our ex-  
81 periments on real and simulated data show that DISCERN outperforms several  
82 existing algorithms in gene expression inference across a wide array of single  
83 cell datasets and technologies, improving cell clustering, cell type and activity  
84 detection, and pathway and gene regulation identification. To obtain deep in-

85 sights into the cellular changes underlying COVID-19, we reconstructed single  
86 cell expression data of patient blood and lung immune data. While in our ini-  
87 tial analysis [22] of blood data we detected few immune cell types, expression  
88 reconstruction with DISCERN resulted in the detection of 28 cell types and  
89 states in blood, including two novel disease-associated T cell types, cytotoxic  
90 CD4<sup>+</sup> and CD8<sup>+</sup> Tc2 T helper cells. Reconstructing a second COVID-19 blood  
91 dataset with disease severity information, we were able to classify mild and se-  
92 vere COVID-19 with an AUROC of 81 %, obtaining a potential biomarker of  
93 disease stage. DISCERN can be easily integrated into existing workflows, as an  
94 additional step after count mapping. Given that DISCERN is not limited by  
95 a predefined distribution of data, we believe that it can be readily adapted to  
96 enhance various other biomedical data types, especially other omics data such  
97 as proteomics and spatial transcriptomics.

## 98 2. Results

### 99 2.1. The DISCERN algorithm for directed expression reconstruction

100 We aim to realistically reconstruct gene expression in scRNA-seq data by  
101 using a related hq dataset. Ideally, this expression reconstruction algorithm  
102 should meet several requirements [7]. First, it needs to be **precise** and model  
103 gene expression values realistically. It shouldn't remove information of cellular  
104 identity to form 'average cells' or collapse different cell types or states into one.  
105 Second, the network should be **robust** to the presence of different cell types  
106 in hq and lq data, or an imbalance in their relative ratios. It shouldn't, for  
107 instance, 'hallucinate' hq-specific cells into the lq data. Lastly, the network  
108 should be directional, as the user should be able to choose the target (reference)  
109 dataset.

110 With these prerequisites in mind, we designed a deep neural network for  
111 directed single cell expression reconstruction (DISCERN) (Figure S1B) that is  
112 based on a modified Wasserstein Autoencoder [23]. A unique feature of DIS-  
113 CERN is that it transfers the "style" of hq onto lq data to reconstruct missing  
114 gene expression, which sets it apart from other batch correction methods such  
115 as [24], which operate in a lower dimensional representation of the data (e.g.  
116 PCA, CCA). To allow DISCERN to accurately reconstruct single cell RNA-  
117 seq expression based on reference data, the structure of the network had to be  
118 adapted in several ways. First, we implemented Conditional Layer Normaliza-  
119 tion (CLN) [25, 26, 20] to allow for directed expression reconstruction of lq data  
120 based on reference hq data (Figure S1B & S2). Second, we added two decoder  
121 heads to the network to enable it to model dataset-specific dropout rates and  
122 gene expression separately. Lastly, we extended DISCERN's loss function with  
123 a binary cross-entropy term for learning the probability of dropouts to increase  
124 general inference fidelity. Further algorithmic details of DISCERN can be found  
125 in the methods and Figures S1 and S2.

126 We first demonstrate DISCERN's capabilities to faithfully reconstruct gene  
127 expression using five pancreas single cell expression datasets of varying quality

128 (Tables S1 and S2). The pancreas data is widely used for benchmarking and it  
129 is ideal to evaluate expression reconstruction for many cell types and sequencing  
130 technologies. We consider a dataset as hq when the average number of genes  
131 detected per cell (GDC) (e.g. smartseq2, GDC 6214) is much higher than in a  
132 comparable lq dataset (Table S2). Conversely, a dataset is lq when the average  
133 cell has lower counts and fewer genes expressed than a comparable hq dataset  
134 (e.g. indrop, GDC 1887). Throughout this text, we will name sequencing tech-  
135 nologies with capital (e.g. Smart-Seq2, InDrop) and datasets with lower case  
136 first letters (smartseq2, indrop). We trained DISCERN on these five pancreatic  
137 single cell datasets and assessed the integration of data in gene space and the  
138 average expression reconstruction per cell type. While uncorrected data cluster  
139 by batch and not by cell type, DISCERN-integrated data show good batch  
140 mixing and clustering of cells by cell type across all five datasets (Figure 1B &  
141 Figure S2). To get a clearer picture of DISCERN's expression reconstruction  
142 capabilities we next calculated correlation coefficients of measured expression  
143 between the lowest quality inDrop and highest quality Smart-Seq2 data, before  
144 and after expression reconstruction using DISCERN. The mean expression re-  
145 construction of indrop-lq to smartseq2-hq and smartseq2-hq to indrop-lq data  
146 is very accurate, showing a Pearson correlation of  $r = 0.95$  ( $p < 0.001$ ), while  
147 mean expression correlation between uncorrected indrop-lq and smartseq2-hq  
148 data is only  $r = 0.77$  due to strong batch effects (Figure 1C & D, Figures S3  
149 and S4). The improved quality of indrop-lq data reconstructed to smartseq2-hq  
150 level is validated by the strong increase of genes expressed per cell, ranging from  
151  $\approx 2000$  genes per cell in the uncorrected indrop-lq data to  $\approx 6000$  genes in the  
152 indrop-lq data after reconstruction (Figure S5).

153 We next investigated the effect of reconstruction of three cell type-specific  
154 genes, before and after correction across the five pancreas datasets (Figure S6).  
155 Insulin expression in the pancreas should be largely restricted to beta cells [27],  
156 which can be observed in the uncorrected smartseq2-hq and celseq2 datasets,  
157 while the indrop-lq batch shows a diffuse pattern of insulin expression across  
158 cell types (Figure S6A left panel). This diffuse insulin expression is corrected  
159 by reconstructing the smartseq2-hq expression pattern from the indrop-lq data  
160 (Figure S6A middle panel). In general, the expected specificity of insulin ex-  
161 pression in beta cells can be recovered for all datasets when using DISCERN's  
162 reconstruction using the smartseq2-hq reference. Conversely, the reconstruction  
163 from hq to the indrop-lq reference results in diffuse insulin expression across all  
164 reconstructed datasets (Figure S6A right panel). We obtained similar results for  
165 the pancreatic acinar cell-specific gene REG1A and the delta cell-specific gene  
166 SST, both of which show diffuse expression across cell types in the uncorrected  
167 inDrop data and cell-specific expression after reconstruction using smartseq2-hq  
168 reference (Figure S6B & C). Interestingly, DISCERN can not only recover bio-  
169 logical expression information, but it is also able to apply sequencing method-  
170 specific effects after reconstruction. The smartseq2-hq dataset, for instance,  
171 displays nearly no ribosomal protein coding gene expression after sequencing as  
172 previously reported by [8], while data sequenced using InDrop, Cel-Seq, or Cel-  
173 Seq shows prominent ribosomal protein coding gene expression (Figure S6D, left

174 panel). When reconstructing smartseq2-hq data to indrop-lq data, ribosomal  
175 protein coding gene expression is re-instantiated (Figure S6D, right panel).

176 We further corroborated DISCERN’s capability to integrate and reconstruct  
177 gene expression in the more complex difftec dataset (Tables S1 and S2), consist-  
178 ing of 14 single cell peripheral blood mononuclear cell (PBMC) datasets across a  
179 wide range of technologies. Similar to pancreas, the difftec dataset is widely used  
180 for benchmarking and it is ideal to evaluate expression reconstruction for even  
181 more cell types and sequencing technologies. The different single cell technolo-  
182 gies show large variation in quality, with an GDC ranging from 422 in Seq-Well  
183 to 2795 in Smart-seq2. We trained DISCERN on these 14 PBMC single cell  
184 datasets and observed very good integration in gene space (Figure S7). We  
185 then reconstructed chromium-v2-lq (GDC 795) using a chromium-v3-hq refer-  
186 ence (GDC 1514) and observed high mean gene expression correlation between  
187 the reconstructed and reference datasets (Figures S8 and S9). These results  
188 across 19 single cell datasets provide first evidence for the high-quality data in-  
189 tegration and expression reconstruction that can be obtained with DISCERN.

## 190 *2.2. Specific and robust gene expression inference*

191 We next investigated the precision and robustness of DISCERN’s expression  
192 reconstruction in more detail and compared DISCERN’s performance to several  
193 state-of-the-art algorithms for expression imputation and data integration.

194 Since expression reconstruction can be seen as a generalization of expression  
195 imputation, we compared DISCERN to DCA, MAGIC, and scImpute, three  
196 state-of-the-art imputation algorithms [11, 12, 13]. Expression reconstruction  
197 can also be viewed as a batch correction task in gene space, which is why we ad-  
198 ditionally compared DISCERN to scGEN and Seurat [21, 24]. It is important to  
199 note, however, that neither Seurat nor scGEN were designed for the expression  
200 reconstruction task. Seurat and scGEN use a lower dimensional representation  
201 in which a linear transformation aligns different batches. Seurat uses canonical  
202 correlation analysis and scGEN uses the bottleneck layer representation of an  
203 autoencoder to calculate and apply linear transformations.

204 To investigate the precision of gene expression reconstruction, we created an  
205 artificial dataset by dividing the smartseq2-hq pancreas data into two batches,  
206 smartseq-lq and smartseq2-hq. In the smartseq-lq batch, the top one KEGG  
207 pathways per cell type were removed by setting the expression of genes con-  
208 tained in these pathways to zero, while the smartseq2-hq remained unaltered.  
209 Therefore, a reconstruction of smartseq-lq data using smartseq2-hq reference  
210 (reconstructed-hq) should ideally recover the smartseq-lq expression to its orig-  
211 inal state, prior to the removal of the genes. DISCERN is able to reconstruct  
212 the mean expression for all cell types, achieving a correlation  $r = 0.99$  (Fig-  
213 ure 2A). DCA ( $r = 0.66$ ), MAGIC ( $r = 0.34$ ), scImpute ( $r = 0.80$ ), and Seurat  
214 ( $r = 0.76$ ) have significantly lower correlation between the smartseq2-hq and  
215 reconstructed-hq gene expression (Figure 2A). scGen shows only slightly reduced  
216 performance ( $r = 0.98$ ) compared to DISCERN, especially in the reconstruction  
217 of highly expressed genes (Figure 2A) and low abundant cell types (Figure S10,

218 Megakaryocytes). We obtained similar results on the difftec dataset, with DIS-  
219 CERN ( $r = 0.98$ ) outperforming DCA ( $r = 0.47$ ), Magic ( $r = 0.21$ ), scImpute  
220 ( $r = 0.04$ ), Seurat ( $r = 0.92$ ), and scGEN ( $r = 0.94$ ) (Figure S10). To further  
221 investigate gene expression reconstruction specificity, we compared the correla-  
222 tion of reconstructed-hq to smartseq2-hq data after performing differential gene  
223 expression (DEG) for each cell type against all other cell types (Figure 2B, up-  
224 per panel). DISCERN is able to recover the correct DEG t-statistics with a  
225 median correlation of 0.92, improving over state-of-the-art tools by more than  
226 15 percentage points. In the corresponding experiment using the difftec dataset,  
227 DISCERN achieves a median correlation of 0.85, which is a 25 percentage point  
228 improvement over competing methods (Figure S11).

229 Since the genes were initially selected using KEGG gene set enrichment  
230 analysis, the reconstruction of the corresponding pathways was investigated by  
231 performing KEGG gene set enrichment analysis on the DEG results. DISCERN  
232 is able to recover the pathway expression enrichment scores with a median cor-  
233 relation of 0.93, exceeding the performance of Seurat and scGEN by more than  
234 11 percentage points on median (Figure 2B, lower panel). In the corresponding  
235 experiment using the difftec dataset, DISCERN achieves a median correlation  
236 of 0.77, outperforming Seurat and scGen by more than 16 percentage points  
237 (Figure S12).

238 While DISCERN outperforms competing algorithms in expression and path-  
239 way reconstruction correlation, it achieves the second-best correlation for the  
240 DEG fold-change (FC) of reconstructed-hq to smartseq2-hq data for the pan-  
241 creas (Figure S13) and reconstructed-hq to chromium-v3-hq difftec datasets  
242 (Figure S14). In both cases Seurat achieves slightly better correlation, which is  
243 due to the fact that DISCERN slightly underestimates FC in favor of superior  
244 DEG variance estimation.

245 Next, we show DISCERN's expression reconstruction robustness with re-  
246 spect to varying sizes of lq to hq data. It is conceivable to assume that a large  
247 amount of hq data would benefit the expression reconstruction of the lq data,  
248 which makes it important to understand at what ratio good results can be ex-  
249 pected. Interestingly, DISCERN seems to be very robust across a wide range  
250 of smartseq2-lq to smartseq2-hq ratios, with correlations of 0.98 (ratio of lq/hq  
251 0.14) to 0.93 (ratio of lq/hq 18.4), while the second-best performing algorithm  
252 scGen showed a 11 percentage point decrease in performance (0.82 for ratio of  
253 lq/hq 18.4) (Figure 2C, Figure S15). We observed similar results for the correla-  
254 tion of t-statistics, showing a slight dependence of DISCERN's performance on  
255 the lq/hq ratio (Figure S16). In general, all methods show better performance  
256 with a small ratio of lq/hq data, while DISCERN shows least dependence and  
257 outperforms other algorithms in the correlation of expression and t-statistics,  
258 especially in the case of high lq/hq ratio.

259 Another aspect of expression reconstruction robustness is the dependence of  
260 the algorithm on the cell type or cell state similarity of the lq and hq datasets.  
261 In the optimal case, DISCERN would not require that the lq and hq datasets  
262 have overlapping cell types to perform an accurate expression reconstruction,  
263 which is theoretically possible if the network learns the general gene-regulatory

264 expression logic of the hq data (see discussion). To understand the dependence  
265 on dataset similarity, we removed a complete cell type, pancreas alpha cells, from  
266 the smartseq2-hq data and left the alpha cells in the smartseq2-lq data. We then  
267 additionally varied the number of common cells in the lq and hq data, starting  
268 with no overlapping cells (only alpha cells in the lq and all cells except alpha in  
269 the hq data) and ending with almost complete overlap (all cells overlap between  
270 the smartseq2-hq and -lq data, except for the alpha cells only present in lq data)  
271 (Figure 2D). When evaluating DEG correlation, DISCERN was the only method  
272 consistently achieving better performance than uncorrected data, outperforming  
273 Seurat and scGen by more than 15 percentage points (Figure 2D). Similarly,  
274 DISCERN was the only method consistently achieving better performance than  
275 uncorrected data in the FC correlation task (Figure S17).

276 We next took a closer look at the integration and expression reconstruction  
277 performance when no cell types overlap between the lq (alpha cells only) and hq  
278 (all other cells) data. Notably, Seurat seems to over-integrate cell types, mix-  
279 ing smartseq2-hq beta and gamma cells with reconstructed-hq alpha cells from  
280 other batches (Figure S18), while scGEN and DISCERN keep the smartseq2-hq  
281 and reconstructed-hq exclusive cell types separate (Figure 2E & Figure S18).  
282 This over-integration seems to be causal for Seurat's poor DEG correlation per-  
283 formance ( $r = 0.28$ ), while DISCERN ( $r = 0.55$ ) is the only method achieving  
284 better performance than uncorrected cells ( $r = 0.47$ ) (Figure 2F). Thus, DIS-  
285 CERN is able to keep existing expression correlations and improves the detec-  
286 tion of cell type specific genes by reconstruction using an hq batch as reference.  
287 In conclusion, DISCERN is both a precise and robust method for expression  
288 reconstruction that outperforms existing methods by a significant margin.

### 289 *2.3. Improving cell cluster, type, and trajectory identification*

290 The comparison to competing methods provided evidence for DISCERN's  
291 superior expression reconstruction. Now, we will delineate how DISCERN's  
292 expression reconstruction improves downstream cell clustering, cell type and  
293 activity state identification, marker gene determination, and gene regulatory  
294 network and cell trajectory analysis.

295 To understand if cell-determining gene expression and pathways could be  
296 recovered with expression reconstruction, we used a single nuclear sequencing  
297 (sn-lq) and scRNA-seq (sc-hq) data pair that was prepared from the same liver  
298 metastasis biopsy [28]. We reconstructed sn-lq data using the sc-hq reference,  
299 obtaining reconstructed-hq data. While single nuclear sequencing provides re-  
300 duced expression information in the average counts per cell as compared to  
301 scRNA-seq (Table S2) [28], it is still the method of choice to obtain cell-specific  
302 expression information when intact single cells cannot be recovered from a tis-  
303 sue (e.g. after tissue fixation or freezing). It is important to note that nuclear  
304 transcripts reflect current gene activity, which in part might not correlate with  
305 transcripts that have lifetimes of up to days. Before integration, the sn-lq and  
306 sc-hq datasets cluster by batch and not by cell type, while after expression re-  
307 construction with DISCERN cells cluster by type and not by batch (Figure S19).  
308 This is reflected in an expression correlation of 0.49 (sc-hq vs. sn-lq) before and



0.93 after reconstruction (sc-hq vs. reconstructed-hq) (Figure S20). Seurat reconstructed expression, on the other hand, is barely different from uncorrected sn-lq data. This is reflected in a similar UMAP representation (Figure S19) and an identical expression correlation of 0.49 with uncorrected sn-lq data (Figure S20). DISCERN reconstruction resulted in the expression of T cell receptor signaling genes in reconstructed T cells (Figure S21) and antigen presentation genes in macrophages (Figure S22), providing evidence that DISCERN faithfully recreates cell-determining genes and pathways based on the hq data. Seurat is not able to reconstruct the expression information and shows a similar expression pattern as the uncorrected sn-lq dataset. In both datasets (seurat-hq and sn-lq) the expression of important T cell marker genes such as *CD3E*, *CD3D* and *CD8A* is largely absent, while in sc-hq and reconstructed-hq the expression is easily detectable (Figure S21). To further corroborate the advantage of single nuclear expression reconstruction, we next aimed to increase the T cell subtype resolution of human single nucleus acute kidney injury data (kidney-lq) by using matching single cell data (kidney-hq). Only 1% of kidney-lq nuclei show *CD3D*, *CD3E* or *CD3G* expression, compared to 7% of the cells in the kidney-hq dataset. Seurat and DISCERN were able to detect T cells in the reconstructed kidney-lq (reconstructed-hq) and the kidney-hq data with notable *CD3D* expression in this cluster (Figure S23). The reconstructed-hq and the kidney-hq T cells were further classified into T cell subtypes and activation states (Figure S23C). While a large proportion of T cells detected in Seurat reconstructed data could not be annotated due to missing *CD3D*, *CD4*, and *CD8A* expression, DISCERN reconstructed data does not present these limitations.

It is intriguing to observe that many marker genes are still hard to detect in kidney single cell RNA-seq data but also in the antigen presentation pathway in macrophages (Figure S22). This is most probably due to dropout. Thus, we rationalized that bulk RNA sequencing (RNA-seq) data of purified cell types (e.g. FACS sorted immune cells) is a suitable hq proxy for the expected gene expression per cell. RNA-seq data of purified cells is readily available from public repositories, making it possible to obtain thousands of purified immune cell RNA-seq samples (see methods). We therefore set out to increase cluster, cell type, gene regulatory network, and trajectory identification of scRNA-seq data by reconstructing gene expression using a related RNA-seq reference (Figure S24). For the scRNA-seq data we chose a cord blood mononuclear citeseq dataset (cite-lq) that was labeled with 15 antibodies (Table S3) to allow for surface protein-based cell type discovery [29]. The CITE-seq information allowed us to confirm expression reconstruction by DISCERN in cases where gene expression is absent but protein expression and cell identity are validated via antibody labeling. For the RNA-seq data, we selected 9.852 purified immune samples (bulk-hq) and proceeded to reconstruct cite-lq (GDC 798) using a bulk-hq (GDC 13.104) reference to obtain reconstructed-hq data with DISCERN. We first investigated the correspondence of gene expression prior (cite-lq) and post reconstruction (bulk-hq) with antibody-based surface protein labeling of *CD3D*, *CD4*, *CD8A*, *CD2*, *B3GAT1*, *FCGR3A*, *CD14*, *ITGAX* and *CD19* (Figure 3A, Figure S25). For several proteins (CD8A, B3GAT1, CD4), the corresponding

355 cite-lq gene expression was absent and cell type-specifically re-instantiated in  
356 the reconstructed-hq expression data with DISCERN (Figure 3A, Figure S25).  
357 In cases where cell type-specific gene and protein expression matched cite-lq  
358 data (*CD3D*, *CD14*) the expression in reconstructed-hq data was left unaltered  
359 (Figure S25). In some instances, we observed low cell type-specific expression  
360 in the cite-lq data (*CD8A*, *CD2*, *FCGR3A*, *CD19*) that matched protein ex-  
361 pression (Figure S25). In these cases, gene expression was increased in the cor-  
362 rect cell types in the reconstructed-hq data. In general, we observed increased  
363 agreement between cell type-specific surface protein and gene expression af-  
364 ter reconstruction, showing that DISCERN doesn't invent or 'hallucinate' cell  
365 types but reconstructs the expected expression specific for each cell type. We  
366 further corroborated these results by selecting eight known cell type-specific  
367 cytosolic proteins and investigated their expression before and after expression  
368 reconstruction. *MS4A1* (B cells), *IL7R* (CD4<sup>+</sup> T cells), *MS4A7* (Monocytes),  
369 *GNLY* and *NKG7* (NK cells) showed consistent expression before and after  
370 reconstruction (Figure S26). The chemokine receptors *CCR2* (Monocytes, ac-  
371 tivated T cells), *CXCR1* (NK cells), and *CXCR6* (CD8<sup>+</sup> T cells) showed the  
372 correct cell type-specific expression only after expression reconstruction (Fig-  
373 ure S26) [30]. It is notoriously hard to obtain cell subtype-specific information  
374 from blood mononuclear scRNA-seq data, especially for CD4<sup>+</sup> T helper cells due  
375 to their limited activation status in healthy individuals. This doesn't mean that  
376 polarized CD4<sup>+</sup> T helper cells do not exist in healthy blood, as they are com-  
377 monly detected after stimulation using FACS (Table S3) [31]. This lack of reso-  
378 lution in scRNA-seq impedes clustering, marker gene, and trajectory analyses, a  
379 drawback that could be overcome using DISCERN's expression reconstruction.  
380 We therefore compared CD4<sup>+</sup> T cell (gene expression of *CD4* > 1 and *CD3E*  
381 > 2.5) clustering and subtype identification using cite-lq and reconstructed-  
382 hq data. While clustering with the leiden algorithm [32] using highly variable  
383 genes of cite-lq data resulted in an unstructured distribution of CD4<sup>+</sup> T cell  
384 subtypes (Figure 3B), clustering of reconstructed-hq data yields detailed in-  
385 sights into T helper cell subtypes of blood mononuclear data (Figure 3C). Af-  
386 ter reconstruction, we were able to characterize TH17, TH2, TH1, HLA-DR  
387 expressing TREG (Active\_TREG), naive CD4<sup>+</sup> T cells (CD4\_naive), effector-  
388 memory CD4<sup>+</sup> T cells (CD4\_EM), central-memory CD4<sup>+</sup> T cells (CD4\_CM),  
389 and effector cells expressing IFN-regulated genes (IFN\_regulated) (Figure 3C).  
390 We selected published cell-determining marker genes and observed that many of  
391 them were dropped out in the uncorrected data but present after reconstruction  
392 (Figure S27). The absence of marker genes in uncorrected data results in poor  
393 clustering and cell type identification, while single positive cells are detectable  
394 in the respective neighborhood identified by reconstructed counts (Figure S27).  
395 Importantly, we observed that in all cases the DISCERN-estimated proportions  
396 of T helper subsets fall within the range of expected proportions as assessed by  
397 previous FACS studies (Table S3, Figure S28). These findings are important,  
398 as they prove once more that DISCERN discovers the correct cell subtypes and  
399 cell proportions, in this case substantially outperforming the available CITE-seq  
400 information in cell subtype resolution.

401 To further verify the cell type annotations, we extracted the top cluster-  
402 determining genes from the reconstructed-hq data. Members of the TNF-  
403 receptor superfamily are known to be expressed in T helper cell subtypes [33],  
404 which can be observed after reconstruction in TH17 cells and partially in TH1,  
405 TH2, Active\_TREG and IFN\_regulated cells (Figure S29). Similarly, recon-  
406 structed TH1 cells show the expected high expression of granzymes *GZMK* and  
407 *GZMA* [34], while *MIAT* and *HLA* expression are found in activated TREG  
408 cells after reconstruction (Active\_TREG cluster, Figure S29) [35, 36]. *NOG* ex-  
409 pression is detected in reconstructed CD4\_naive cells, as previously described  
410 [37]. In addition, reconstructed CD4\_naive, CD4\_EM and CD4\_CM show low  
411 expression of the genes important for the T helper subtypes TH1, TH2, TH17,  
412 Active\_TREG and IFN\_regulated. We further corroborated our cell type anno-  
413 tation of reconstructed-hq data by observing the expected expression of several  
414 established T cell subtype markers (Figure S30). We compared these newly  
415 found clusters to representations found with Seurat, multigrade, and in uncor-  
416 rected cite-lq data. The uncorrected cite-lq data manifests cluster separation  
417 for some cell types, most notably IFN\_regulated and Active\_TREG cells (Fig-  
418 ure S31A). Seurat reconstruction and multigrade imputation with CITE-seq  
419 information results in the mixing of cell types and clusters (Figure S31B & C).  
420 A further comparison to Bfimpute and SCRABBLE was impossible due to the  
421 dataset size, as outlined in the introduction.

422 Similar to improved clustering and cell subtype detection, DISCERN reconstructed-  
423 hq data resulted in improved gene regulatory network inference with SCENIC  
424 [38]. SCENIC infers transcription factor-regulated gene expression modules  
425 of single cell data. While cite-lq data resulted in a scattered distribution of  
426 transcription factor networks across several T helper cell subtypes, SCENIC  
427 with reconstructed-hq data showed transcription factor regulation in the cor-  
428 rect subtypes (Figure 3D). After expression reconstruction the IKZF2 regulon  
429 is detected in activated TREG cells [39] and the MAF regulon is found in differ-  
430 entiated CD4<sup>+</sup> T cells but not in naive CD4<sup>+</sup> T cells [40]. A weak signal of the  
431 MAF regulon is already detectable in the cite-lq data, yet strongly increased in  
432 reconstructed-lq, while maintaining differentiated T helper cell specificity (Fig-  
433 ure 3D). Furthermore, after reconstruction with DISCERN we could identify  
434 the TH17 associated master transcriptional regulators RORC(+) and RORA(+)  
435 [41], which were scattered over all TH17 cells before reconstruction (Figure S32).  
436 Seurat is able to partially reconstruct the expression of the RORC(+) regulon  
437 but fails to detect the more specific RORA(+) expression (Figure S32).

438 Finally, we wanted to investigate if DISCERN could also enhance cell trajec-  
439 tory analyses with Slingshot of the citeseq data [42]. We focused on the differen-  
440 tiation of effector and other T helper cell subtypes and found five lineages that  
441 either pass through or terminate in the effector cell cluster in reconstructed-hq  
442 data (Figure 3C). Two trajectories were of special interest to us: Lineage1 from  
443 CD4\_naive to TH1 cells (Figure S33) and Lineage2 from CD4\_naive to TH17  
444 cells (Figure S34). While the expression change along the trajectory in uncor-  
445 rected data (Figure S33A, Figure S34A) is hardly visible, cell type-specific clus-  
446 ters can be easily observed after DISCERN reconstruction (for lineage details

447 see Figure S33B, Figure S34B). The detailed insights into cell differentiation  
448 that we obtained with reconstructed data are in stark contrast to the Slingshot  
449 results obtained with cite-lq data. While terminal effector molecules can be de-  
450 tected with cite-lq data and seurat-hq data, intermediate stages remain hidden,  
451 which prohibits the detection of trajectories and results in a shuffling of marker  
452 gene expression (Figures S33 and S34). Taken together these results highlight  
453 how expression reconstruction using DISCERN improves downstream analyses  
454 and yields deeper biological insights into cell type and state identification, gene  
455 regulation, and developmental trajectories of cells.

#### 456 *2.4. Discovering COVID-19 disease-relevant cells in lung and blood*

457 The previous sections have demonstrated DISCERN's utility to reconstruct  
458 single cell expression data based on an hq reference, vastly improving the detec-  
459 tion of cell (sub-) types and their signaling. Given these advantages, we won-  
460 dered if DISCERN's expression reconstruction could deepen our understanding  
461 of cell type-composition and signaling changes of immune cells in COVID-19  
462 disease (Figure S35), using two published datasets [43, 22]. To obtain best re-  
463 construction results, we again resorted to using bulk-hq immune reference data  
464 (Table S1) [44], as outlined in the previous section.

465 First, we used a COVID-19 blood dataset (covid-blood-lq) with limited cell  
466 type resolution, which was originally analyzed by our group using Seurat (Ta-  
467 ble S1) [22]. While  $CD4^+$ ,  $CD8^+$ , and NK cells formed separate clusters we  
468 were unable to visibly distinguish subpopulations of these cells in covid-blood-  
469 lq data [22]. Reconstruction of gene expression using bulk-hq data led to the  
470 identification of 24 subtypes of  $CD4^+$  and  $CD8^+$  T cells in covid-blood-hq data  
471 (Figure S36). Several cell clusters identified in covid-blood-hq data showed the  
472 correct cell type-specific marker gene expression in covid-blood-lq data, albeit  
473 in fewer cells, reduced in magnitude, and in some cases less specific (Figures S37  
474 and S38). Reconstruction also led to the identification of  $CD4^+$  TH17 helper  
475 cells that express *RORC* (Figure 4A & B, Figure S39). Based on the molecular  
476 footprint of these TH17 cells they were further subdivided into TH17\_cluster1  
477 that exhibits a memory T cell phenotype with elevated *IL7R* expression and  
478 TH17\_cluster2 that exhibits an activated T cell phenotype with elevated *MHC-*  
479 *II*, *CCR4* and *RBPJ* expression (Figure 4B, Figure S39). The expression of  
480 *RBPJ* is of particular interest, as it is linked to TH17 cell pathogenicity, sug-  
481 gesting a role of pathogenic TH17 cells in COVID-19 [45]. It is common practice  
482 to stimulate memory T cells in vitro to trigger IL-17A production and a shift  
483 towards a TH17 phenotype was previously described in COVID-19 [46]. With  
484 DISCERN we are able to distinguish these cells in COVID-19 patient blood  
485 without stimulation, identifying cytokine producing memory cells with a TH17-  
486 like phenotype (Figure S39).

487 To further validate the existence of activated TH17 cells in COVID-19 pa-  
488 tient blood, we next analyzed the corresponding lung data (covid-lung) of the  
489 patients for shared T cell receptor clones (Figure S40). The underlying assump-  
490 tion is that cells with the same T cell receptor in lung and blood originate  
491 from the same progenitor and therefore have a high probability of belonging

492 to the same cell type. For this comparison we used the cell type annotation  
493 and representation of our original analysis of the covid-lung data, in which  
494 memory T and TH17 cells were readily observed without reconstruction [22].  
495 TH17\_cluster1 cells showed strong clonal overlap with covid-lung CD4<sup>+</sup> memory  
496 T cells (Figure S40) and expressed comparable levels of *RORC* to covid-lung  
497 effector memory TH17 cells (Figure S41), indicating that these CD4<sup>+</sup> central  
498 memory T cells could be TH17 (-like) cells. TH17\_cluster2 in blood exhibited  
499 strong clonal overlap with effector memory and resident memory TH17 cells  
500 in covid-lung data (Figure S40) that express *RORC* and *IL-17A* (Figure S41).  
501 Using the clonotype information of resident memory cells producing *IL-17A* in  
502 inflamed lung (TRM17), we further corroborated the existence of the newly  
503 identified population of IL-17A-producing TH17 cells in reconstructed COVID-  
504 19 blood data (Figure S40). In general, the T cell receptor clonal information in  
505 blood and lung therefore corroborated our cell type annotation in covid-blood-  
506 hq data.

507 To understand the role of T cell subtypes in COVID-19 disease progression  
508 we analyzed a second blood single cell dataset (covid-blood-severity-lq) contain-  
509 ing disease-severity information for 130 COVID-19 patients [43]. To obtain opti-  
510 mal cell type resolution, we combined the covid-blood-severity-lq T cell data[43]  
511 with CD3<sup>+</sup> covid-blood-lq cells [22] and reconstructed gene expression for the  
512 combined dataset using bulk T cell sequencing reference data[44], resulting in  
513 covid-blood-severity-hq data. Many of the 15 CD4<sup>+</sup> T cell clusters identified in  
514 covid-blood-severity-hq data (Figure S42) were also present in the covid-blood-  
515 hq data, further validating the consistency of our cell type identification. This is  
516 also corroborated by the available surface protein data for covid-blood-severity  
517 data, substantiating that naive cells are CD45RA, memory cells are CD45RO,  
518 and effector cell types are CD45RO positive (further details in Figure S43). We  
519 compared the clusters that we identified in the covid-blood-hq with clusters iden-  
520 tified in the covid-blood-severity-hq data and found confined and overlapping  
521 regions of TFH, TH17\_cluster1, and TH17\_cluster2 cells (Figure S44). We also  
522 compared the identified clusters to clusters defined in the original publication  
523 (Figure S45). Cells identified as TFH in the original publication show signif-  
524 icant overlap with naive CD4<sup>+</sup> T cells (defined on transcriptome and protein  
525 level) and CD4<sup>+</sup> IL22<sup>+</sup> cells (CD4.IL22) show marked overlap with TREG cells.  
526 These results confirm once more the precise and robust cell type identification  
527 that can be achieved with DISCERN.

528 Interestingly, we also identified two rather unexpected cell types after re-  
529 construction. One cluster is positive for *CD4* and negative for *CD8A* while  
530 otherwise expressing a signature of CD8<sup>+</sup> effector memory cells with high ex-  
531 pression of *GZMB*, *GZMH* and *PRF1* (Figure 4D & 4E). This signature points  
532 to a CD4<sup>+</sup> cytotoxic phenotype and indeed virus-reactive CD4<sup>+</sup> cytotoxic cells  
533 were described to be increased in blood during COVID-19 [47]. The other cell  
534 type expresses *CD8*, *IL6R*, and *GATA3*, while being negative for *SLAMF7* (Fig-  
535 ure 4D & 4E). These cells were described in the literature to be CD8<sup>+</sup> T helper  
536 cells [48], exert T helper function, and have been shown to lack cytotoxicity.  
537 They lack expression of a significant number of cytokines and key transcription

538 factors pointing to a TH17 or TH22 phenotype. On a protein level these cells  
539 express *CCR4*, while being negative for *CCR6*, making them cytolytic CD8<sup>+</sup> T  
540 helper type 2 cells (Tc2) cells. Part of this cluster overlaps with CD4 single-  
541 positive cells and might explain why T helper type 2 cells are missing in the  
542 CD4 cell clustering.

543 Overall, the highly specific and sensitive cell type identification in covid-  
544 blood-severity-hq data enabled us to correlate the five COVID-19 disease sever-  
545 ity categories to shifts in cell type and activity information. We first validated  
546 the decrease in TFH cells with increasing disease severity, as described in the  
547 original work (Figure S46) [43]. TH17 cells have been extensively studied using  
548 flow cytometry and in accordance with our results MHC-II positive as well as  
549 *CCR4* positive cells were described in COVID-19 patients (Figure 4B) [46]. We  
550 observed a strong decrease in naive T helper cells in severe disease, most pro-  
551 nounced for naive TREGs, while the fraction of TH17 cells showed little correla-  
552 tion with disease severity (Figure S46). Of the two mixed cell types we detected  
553 in COVID-19 data, cytotoxic CD4<sup>+</sup> cells were increased in moderate and severe  
554 disease (Figure S47). A similar increase is visible in patients with severe respi-  
555 ratory disease without COVID-19 (Figure S48) and these cells might therefore  
556 be a general marker of severe respiratory illness. Cytolytic CD8<sup>+</sup> Tc2 cells are  
557 increased in patients with severe symptoms and in those who died from COVID-  
558 19 (Figure S47) and are described to be reduced after recovery from COVID-19  
559 [49]. This positive correlation and the known role of Tc2 cells in fibroblast  
560 proliferation induction and tissue remodeling could pinpoint a mechanistic role  
561 of these cells in lung fibrosis as witnessed in severe COVID-19 patients. The  
562 possibility to observe these cells in reconstructed single cell data may pave the  
563 way to study the functional role of these cells in adverse COVID-19 outcome.

564 The relatively strong correlation of some cell types with COVID-19 out-  
565 come suggests that blood cell fraction information might be used for patient  
566 severity prediction. We trained a Gradient Boosting Machine (GBM) using  
567 leave-one-out-cross-validation (LOOCV) on the fractions of all T cell types and  
568 performed a forward feature elimination, to obtain a sparse, optimal model for  
569 patient blood-based severity prediction. We first classified patients into three  
570 groups, mild (union of asymptomatic and mild,  $n = 26$ ), moderate ( $n = 26$ ),  
571 and severe (union of severe and critical,  $n = 19$ ), reaching an AUROC of 0.63  
572 (Table S4). We noticed that the mild and moderate groups were indistinguish-  
573 able for the classifier (Figure S49). Training a GBM classifier on mild and severe  
574 cases substantially increased classification performance, reaching an AUROC of  
575 0.81 and accuracy, and F1 score of 0.82 (Table S4, Figure 4F &G). Compared  
576 to the original T cell types and fractions reported (accuracy 0.61) [43], DIS-  
577 CERN reconstructed T cell fractions are 33 % more accurate in the prediction  
578 of COVID-19 disease severity (Figure 4G, Table S4). This classification improve-  
579 ment is remarkable, given that DISCERN has no notion of disease severity when  
580 it reconstructs gene expression. These results further demonstrate DISCERN's  
581 precise and robust expression reconstruction that enabled the discovery of a  
582 potential new blood-based biomarker for COVID-19 severity prediction.

### 583 3. Discussion

584 The sparsity of gene expression information and high technical noise in sin-  
585 gle cell sequencing technologies limits the resolution of cell clustering, cell type  
586 identification, and many other analyses. Several algorithms such as scImpute,  
587 MAGIC, and DCA have addressed this problem by imputing missing gene ex-  
588 pression in single cell data by borrowing expression information from similar  
589 cells within the same dataset. While gene imputation clearly improves gene  
590 expression by inferring values for dropped out genes, this imputation relies on  
591 the comparison of similar cells with largely absent gene expression information  
592 in the same dataset. With DISCERN we take a completely novel approach  
593 to gene expression inference of single cell data, by realistic reconstruction of  
594 missing gene expression in scRNA-seq data using a related dataset with more  
595 complete gene expression information. We thus propose to call this procedure  
596 ‘expression reconstruction’ to highlight the fundamental difference to classical  
597 imputation and refer to the dataset with missing gene expression information  
598 as low quality (lq) and the reference dataset as high-quality (hq).

599 We provide compelling evidence that our reference-based reconstruction out-  
600 performs classical expression imputation algorithms as well as batch correction  
601 algorithms such as Seurat and scGen, when they are repurposed for expression  
602 reconstruction. To obtain an objective and thorough performance evaluation  
603 for expression inference, we used seven performance metrics on 19 datasets,  
604 including 12 single cell sequencing technologies. We focused our performance  
605 evaluation on three scenarios with available ground-truth information, i) the  
606 in silico creation of defined gene and pathway drop out events in scRNA-seq  
607 data, ii) published hq and lq data pairs from the same tissue (pancreas, difftec,  
608 sn/scRNA-seq datasets), and iii) CITE-seq protein expression as ground-truth  
609 for cell types (citeseq dataset). In total, DISCERN achieved best performance  
610 in 13 out of 15 experiments and obtained second rank in the remaining 2 com-  
611 parisons. While DISCERN yields first place to Seurat in two FC expression  
612 correlation comparisons, it always obtains best results across all datasets in  
613 gene expression, gene regulatory network analysis, pathway reconstruction, and  
614 cell type and activity identification and is the most stable algorithm for different  
615 lq to hq size ratios and cell type overlaps.

616 It is important to note that DISCERN is a **precise** network that models  
617 gene expression values realistically while retaining prior and vital biological in-  
618 formation of the lq dataset after reconstruction. The network is also **robust**  
619 to the presence of different cell types in hq and lq data, or an imbalance in  
620 their relative ratios, and is robust to ‘hallucinating’ hq-specific cells into the lq  
621 data. Several algorithmic choices are the foundation of DISCERN’s precision  
622 and robustness. The network was designed to model the sequencing-technology-  
623 specific and the underlying biological signals in separate components of its ar-  
624 chitecture. Disentanglement of those two components is necessary to accurately  
625 reconstruct expression information in the case where lq and hq datasets have  
626 different content, i.e. cell type compositions. If the component designed to  
627 model the effect of sequencing technology also captures the difference in the

628 biological signal, the reconstruction will lead to a lack of integration across the  
629 two datasets where some cell types are still clustered by dataset (similar to  
630 scGen in Figure S18). On the contrary, if the component modeling the biolog-  
631 ical signal captures sequencing-technology-specific features, the reconstruction  
632 will lead to an over-integration of the datasets where cells of different types are  
633 mixed together (similar to Seurat in Figure S18). The demonstrated ability of  
634 DISCERN to avoid those shortcomings, even in scenarios where there is very  
635 little to no overlap between cell types across datasets, lies in the carefully crafted  
636 balance between the expressivity of its components. The representational capa-  
637 bilities of DISCERN, achieved via batch normalization, five loss terms, and a  
638 dual head decoder, would reduce DISCERN's usability, if they would require fre-  
639 quent dataset-specific tuning. The stability and usability was therefore a central  
640 concern in the design and evaluation phase of DISCERN, which resulted in an  
641 algorithm that gave very good results with a single set of default (hyper-) param-  
642 eters. All comparisons to other algorithms, for instance, were performed with  
643 default settings. Only the expression reconstruction of the exceptionally large  
644 COVID-19 datasets required the fine-tuning of the learning rate, cross entropy  
645 term, sigma, and the MMD penalty term. Another important technical feature  
646 of DISCERN is that it can easily be integrated into existing workflows. It takes  
647 a normalized count matrix, as created by nearly all existing single cell analysis  
648 workflows, as input and produces a reconstructed expression matrix. This can  
649 be used for most downstream applications (i.e. cell clustering, cell type identifi-  
650 cation, cell trajectory analysis, and differential gene expression). DISCERN can  
651 be trained on standard processors (CPU) for small and medium-sized datasets  
652 and requires graphical processing units (GPU) for the expression reconstruction  
653 of large datasets. Altogether, the usability and robustness of DISCERN should  
654 enable even non-expert users to perform gene expression reconstruction.

655 A unique feature of DISCERN is the use of an hq reference to infer biolog-  
656 ically meaningful gene expression. While we consider this a main strength  
657 of DISCERN, the dependence on a suitable reference dataset might also limit  
658 its application. We took great care in this manuscript to mitigate this con-  
659 cern by showing how DISCERN is able to reconstruct gene expression for many  
660 different types of lq and hq pairs, ranging from indrop - smartseq2 to single  
661 nucleus - single cell data pairs. Remarkable in this context is DISCERN's ro-  
662 bustness to differences between the cell type compositions of lq and hq data  
663 pairs, with DISCERN being the only algorithm obtaining robust expression re-  
664 construction when few cell types overlap. We have also shown that purified  
665 bulk RNA-seq samples can be used as hq reference, as successfully applied to  
666 PBMC and COVID-19 datasets in this study. We used 9852 FACS purified  
667 immune cell bulk sequencing samples [44], comprising 27 cell types, to success-  
668 fully reconstruct single cell expression data. This implies that most single cell  
669 studies involving immune cells (with or without other cell types present) can be  
670 reconstructed with DISCERN using a single published bulk RNA-seq dataset.  
671 Furthermore, public RNA-seq repositories such as NCBI GEO contain tens of  
672 thousands of samples of immune and non-immune cells that could serve as refer-  
673 ence for most expression reconstruction experiments. Conversely, pure cell type



674 or subtype bulk RNA-seq data could be hard to obtain as the sorting of cells  
675 might have limited resolution or might be partially impure. In consequence,  
676 the usage of bulk RNA-seq data as reference for expression reconstruction could  
677 lead to a grouping or averaging of cell subtypes. While these potential caveats  
678 might adversely affect expression reconstruction, we have not observed merging  
679 or averaging effects of single cell subtypes when corresponding bulk RNA-seq  
680 cell type information was not present or present at different proportions (Fig-  
681 ure 3B & 3C, Figure S28). Importantly, cells do not necessarily cluster into  
682 distinct classes but can build cell continua, as shown in the trajectory analy-  
683 sis in Figure 3B & 3C, where T cells seem to differentiate into each other and  
684 do not form clearly separable clusters. In general, handling continua of cell  
685 types is challenging for imputation and batch correction algorithms, as many of  
686 them, including for instance scGEN, Bfimpute, SIMPLEs, and cscGAN, require  
687 or recommend cluster or cell type annotation. This might lead to under- or  
688 over-integration of cell continua. DISCERN does not rely on cluster (or cell  
689 type) information and seamlessly integrates and reconstructs cell clusters and  
690 continua (Figure 3C, Figure S36). In conclusion, we provide strong evidence that  
691 DISCERN is widely and easily applicable to many single cell experiments.

692 While DISCERN gave good reconstruction results using default parameters  
693 for most datasets we analyzed, we would like to highlight that the immense  
694 representational power of generative neural networks can remove or hallucinate  
695 biological information if not properly handled [6]. This is true for data inte-  
696 gration [50] as well as for expression reconstruction algorithms and we would  
697 highlight two guiding principles for optimal results. For non-expert users, we  
698 would recommend the use of default settings and a careful selection of a re-  
699 lated hq dataset. When datasets are large and complex, with many cell types  
700 in the lq and several non-overlapping cell types in the hq data, one should al-  
701 ways ensure that training does not merge or mix non-overlapping cell types with  
702 other cells, by investigating that these cells keep their cell type-specific marker  
703 gene expression. Keeping these ‘checks and balances’ will usually result in good  
704 reconstruction results even for complex datasets such as covid-blood-severity.

705 To obtain novel insights into COVID-19 disease mechanisms and a new blood-  
706 based biomarker for disease severity we reconstructed two published datasets  
707 with DISCERN, Hamburg COVID-19 patients (covid-lung, -blood) and the  
708 COVID-19 cell atlas (covid-blood-severity). The application of DISCERN to  
709 the covid-blood dataset (COVID-19 patient blood) enabled us to detect 24 dif-  
710 ferent immune cell types and activity states, which is quite remarkable given  
711 that we find these cells in blood. Two TH17 subtypes caught our attention, as  
712 they share the TCR clonality with the lung data from the same patients (covid-  
713 lung), suggesting bloodstream re-entry of lung TH17 cells. We linked these two  
714 subclusters to their functional role by separating them into a memory-like and  
715 activated-like phenotype. The clonal overlap of activated TH17 cells in blood  
716 with previously discovered lung-resident cells suggests that activated TH17 cells  
717 in blood are resident T cells from the lung reentering circulation. These cells  
718 might in part explain the multi-organ pathology observed in COVID-19, as  
719 activated T cells might travel via the blood to secondary organs and cause in-

720 inflammation and tissue damage. Future work might demonstrate the effect of  
721 these activated T cells on tissue inflammation.

722 Given the detailed cell type and activity information we reached with gene  
723 expression reconstruction, we wondered if changes in blood immune cell popu-  
724 lations might be useful as a biomarker for disease severity prediction. We used  
725 DISCERN to reconstruct the covid-blood and the covid-blood-severity datasets  
726 and again identified a plethora of different T cell subtypes in the blood of pa-  
727 tients with COVID-19. Using these cell proportions, we were able to classify  
728 mild and severe disease using a GBM machine learning algorithm with 82 %  
729 accuracy, outperforming classification with the originally published T cell types  
730 by 21 percent points. This improvement is absolutely striking, as DISCERN  
731 has no notion of the classification groups. It simply reconstructs gene expres-  
732 sion and thereby improves cell type detection. These results are a convincing  
733 implicit proof not only of the usefulness of DISCERN but more importantly of  
734 its precision and robustness. While the use of this scRNA-seq-based biomarker  
735 would be too expensive and time-consuming for clinical care, it strongly suggests  
736 that FACS-based T cell fraction or count information from blood could be used  
737 to trace and predict the severity state and potentially the disease trajectory of  
738 COVID-19 patients.

739 Interestingly, we also discovered two atypical T cell types in reconstructed  
740 COVID-19 patient blood single cell data. While cytotoxic CD4<sup>+</sup> T cells have  
741 been observed in COVID-19, we can show that this increase is not COVID-19  
742 specific and is also observed in other types of pneumonia. Interestingly, we also  
743 detected cytolytic CD8<sup>+</sup> Tc2 cells that express *CD8A*, *GATA3*, *IL6R* and are  
744 negative for *SLAMF6*. This cell type is linked to tissue fibrosis and steroid  
745 refractory disease in asthma [51]. The increase in CD8<sup>+</sup> Tc2 cells that we ob-  
746 serve specifically in COVID-related death could be associated with COVID-19  
747 patients that do not respond to steroids. Demonstration of increase of this cell  
748 type in patients dying of COVID-19 points to a potential therapeutic inter-  
749 vention with the drug Fevipiprant, which blocks CD8<sup>+</sup> Tc2 cell activation and  
750 its pro-fibrotic effects by inhibiting prostaglandin D2 signaling [52]. Functional  
751 analysis of these cells has to demonstrate whether these cells are an early marker  
752 of later death or whether it is a marker of already escalated treatment.

753 The basic concept of utilizing a high-quality reference to improve lower qual-  
754 ity data might be applied to many other research areas where technological  
755 limitations restrict biological insights. The usage of deep generative networks  
756 and other artificial intelligence methodology to infer information beyond what  
757 is technically measurable could be transformative in future biomedical research.

## 758 Acknowledgements

759 We thank Immo Prinz, Manuel Friese, Johannes Soeding, Robert Zinzen, Yu  
760 Zhao and Stefan Kurtz for their helpful comments and suggestions. FH, RK,  
761 MM, PM, & SB were supported by the LFF-FV 78, EU ERare-3 Maxomod,  
762 SFB 1286 Z2, FOR 296, and FOR 5068 research grants. Further support was

763 obtained from the UKE R3 reduction of animal testing grant. CE was sup-  
764 ported by DFG ER 981/1-1 and the clinician scientist programme of university  
765 Hamburg, NG was supported by ERC StG-715271, and SHu was supported by  
766 ERC CoG-865466 and has an endowed Heisenberg-Professorship awarded by  
767 the Deutsche Forschungsgemeinschaft. SHa was funded by the BMBF STOP-  
768 FSGS-01GM1518C and SFB 1192 B08 research grants.

#### 769 **Competing interests**

770 The authors declare no competing interests.

#### 771 **Author contributions**

772 SB initiated and SB, PM, FH, and CE conceptualized the study with help  
773 from MM. FH and CE implemented DISCERN, MM refactored the code, and  
774 PM reviewed the DISCERN implementation. FH, CE, and RK performed the  
775 analyses. SB, PM, NG, and SHu supervised the study. SB, FH, and CE wrote  
776 the manuscript. SHu, PM, NG, RK and SHa provided ideas, contributed to  
777 the manuscript text and critically reviewed the manuscript. RM and MK pro-  
778 vided the Kidney data and supported the manuscript with additional ideas and  
779 analysis for this data set. All authors read and approved the final manuscript.

780 Main figures

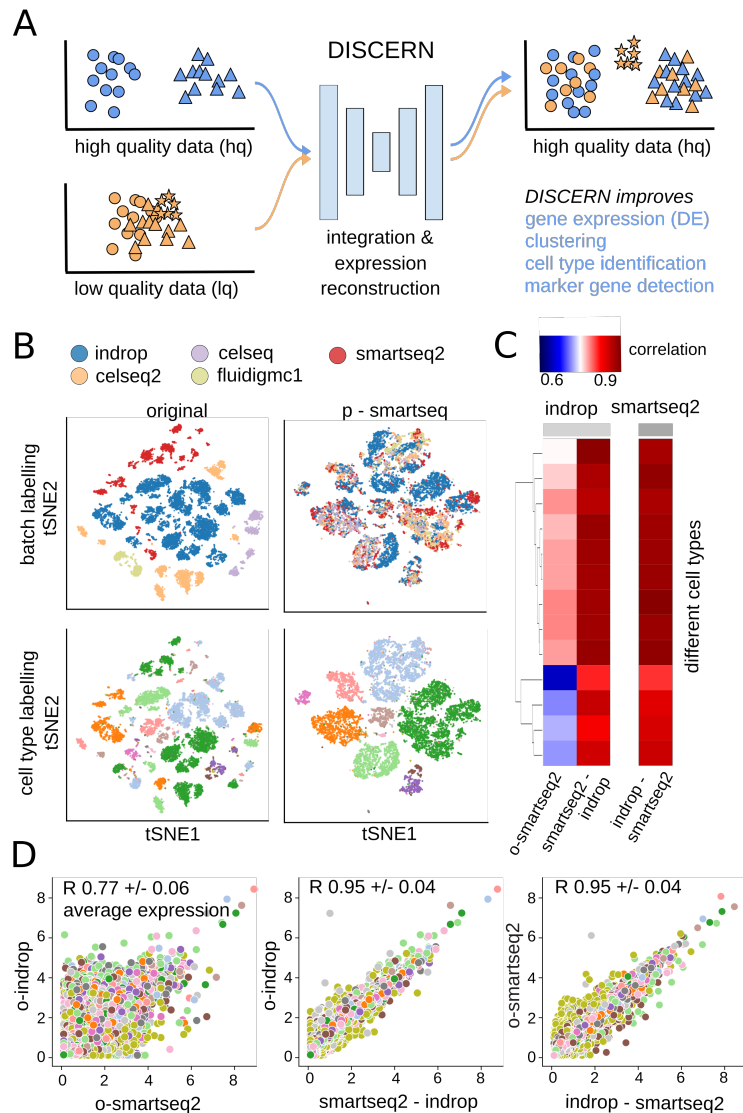

Figure 1: *Integration and expression reconstruction of single cell sequencing data.* **A:** DISCERN transfers the style of a high-quality (hq) dataset to a related low quality (lq) dataset, enabling gene expression reconstruction that results in improved clustering, cell type identification, marker gene detection, and mechanistic insights into cell function. The hq and lq datasets have to be related but not identical, containing for example several overlapping cell types but also exclusive cell types of cell activity states for one or the other dataset. **B:** t-SNE visualization of the pancreas dataset before reconstruction (original) and after transferring the style of the smartseq2 dataset using DISCERN (p-smartseq2). The upper row shows the dataset of origin before and after projection colored by batch and the lower row colored by cell type annotation (details of 13 cell types in supplements). **C** and **D:** Average gene expression (over all the cells of a given type) of the pancreas indrop and smartseq2 datasets before (first column and panel) and after smartseq2 to indrop (second column and panel), and after indrop to smartseq2 projection (third column and panel). **C:** Gene correlation by cell type shown in colored heatmap. **D:** Each colored point represents a single gene colored by the cell type, 'o' refers to original data. The mean Pearson correlation with one standard deviation over all cell types is shown in the figure title.

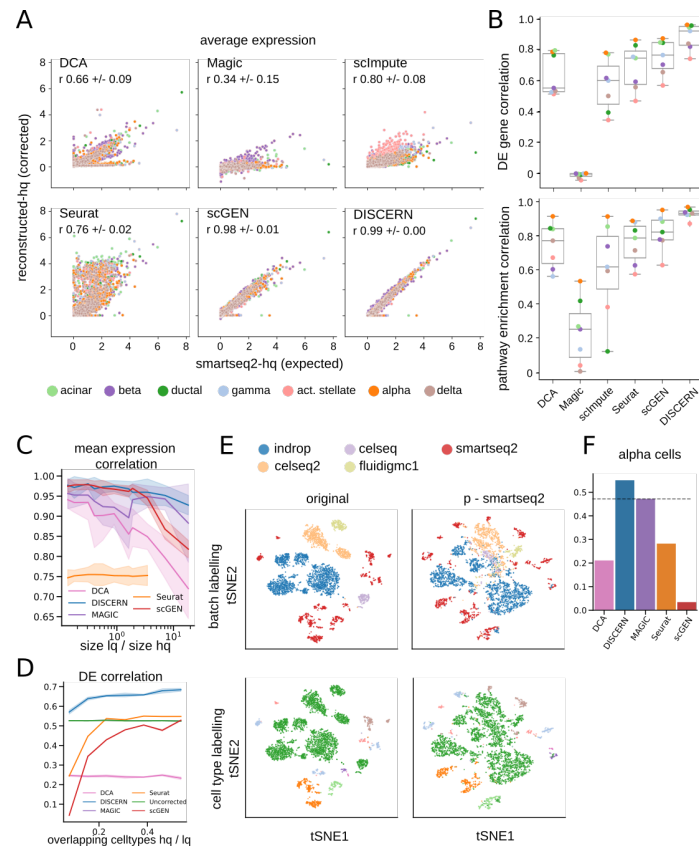

Figure 2: *Expression reconstruction benchmark of DISCERN and five state-of-the-art batch correction and imputation algorithms.* **A:** Comparison of the expression reconstruction performance of Seurat, scGEN, Magic, scImpute, DCA, and DISCERN using smartseq2 data. The smartseq2 data was split into a smartseq2-lq and a smartseq2-hq batch. The smartseq2-lq batch was modified such that the expression of all genes of a cell type determining pathway (top ranked by GSEA) was set to zero. The expression of the in silico altered pathway genes was then compared between reconstructed-hq data and the unaltered smartseq2-hq data. **B:** Differential gene expression and pathway enrichment correlation of the reconstructed-hq to the expected values before removal. The smartseq2-lq data was the same as in **A**. The DEG analysis was restricted to genes which were removed in the smartseq2-lq batch. Correlation of the DEG analysis was based on the t-statistic and for the pathway enrichment analysis on the normalized enrichment scores. **C:** Mean expression correlation of reconstructed-hq with the expected expression in smartseq-hq data for different ratios of lq to hq data. The standard deviation indicates the deviation in correlation of the cell types. The datasets were created as described in **A**. **D:** Alpha cells were removed from the smartseq-hq batch and left in the smartseq-lq batch. The number of other overlapping cell types between the hq and lq data was then altered by removing cell types from the lq data before expression reconstruction (x-axis). The y-axis shows the correlation of the t-statistics of alpha cells from lq-batches vs other cells from the smartseq2 batch with ground truth alpha cells from the smartseq2 batch vs other cells from the uncorrected smartseq2 batch. **E:** t-SNE visualization of the cell type removal experiment where alpha cells are removed from the smartseq2 batch and all non-alpha cells are removed from the lq-batches, such that there is no overlap between lq and hq. **F:** Pearson correlation of the t-statistics of alpha cells from lq-batches vs other cells from the smartseq2 batch with ground truth alpha cells from the smartseq2 batch vs other cells from the uncorrected smartseq2 batch. The dataset was the same as in **E** (no cell type overlap between hq and lq data). The dotted line indicates the correlation achieved without reconstruction.

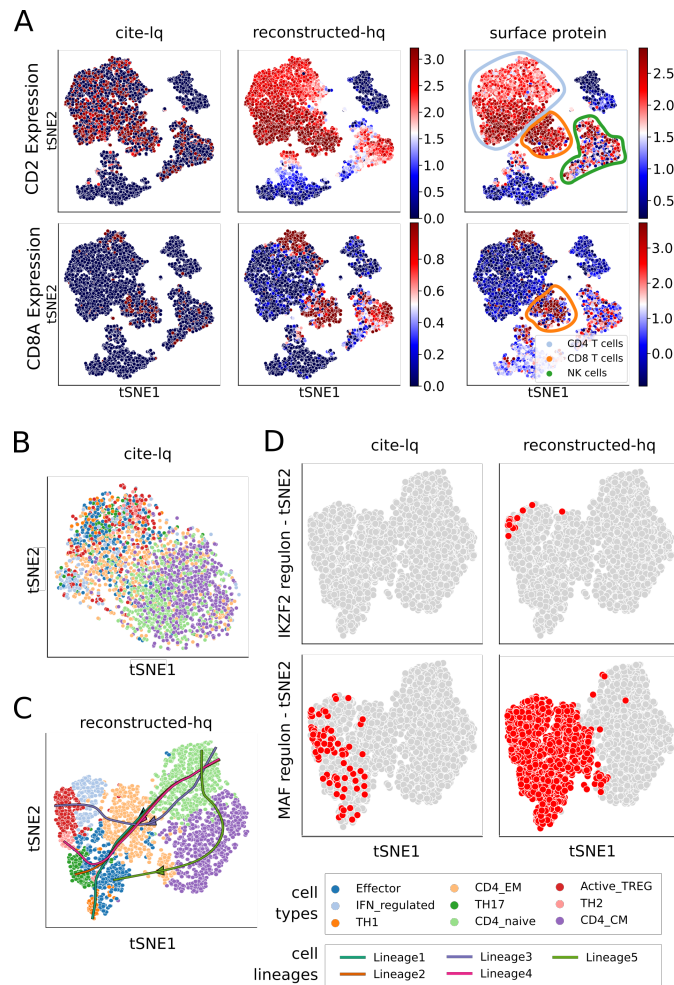

Figure 3: *Expression reconstruction improves downstream analyses including cell identification, gene regulation, and trajectory inference.* The cite-lq dataset was reconstructed using bulk-hq data and compared to ground truth CITE-seq (surface protein) information. The CITE-seq information was not used during training of DISCERN. **A:** t-SNE visualization of *CD2* (first row) and *CD8A* (second row) gene (first two columns) and protein (last column) expression. The first column depicts gene expression for uncorrected cite-lq, the second for reconstructed-hq, and the third protein surface expression ground truth information. Cell types commonly known to express these genes are highlighted with colored circles in the last column. **B:** t-SNE visualization of  $CD4^+$  T cells in the cite-lq dataset. Cell types were assigned using louvain clustering on the reconstructed-hq data (see C) and show no clear clustering. **C:** t-SNE and trajectory information of  $CD4^+$  T cell subtypes found by Slingshot analysis on reconstructed-hq data. While uncorrected data shows no clear cell type clustering (see B), reconstructed data shows a clear grouping of cell types. Trajectories were calculated using *CD4\_naive* as starting point and *TH2*, *TH17*, *TH1*, *Active\_TREG*, *CD4\_CM* as endpoints. Lineage1 indicates *TH1*, Lineage2 *TH17*, Lineage3 *Active\_TREG*, Lineage4 *TH2*, and Lineage5 *Effector* cell differentiation. **D:** Detection of regulons that are specific for  $CD4^+$  T cell subtypes using pySCENIC. The first column shows regulons found in the uncorrected cite-lq and the second column in reconstructed-hq data.

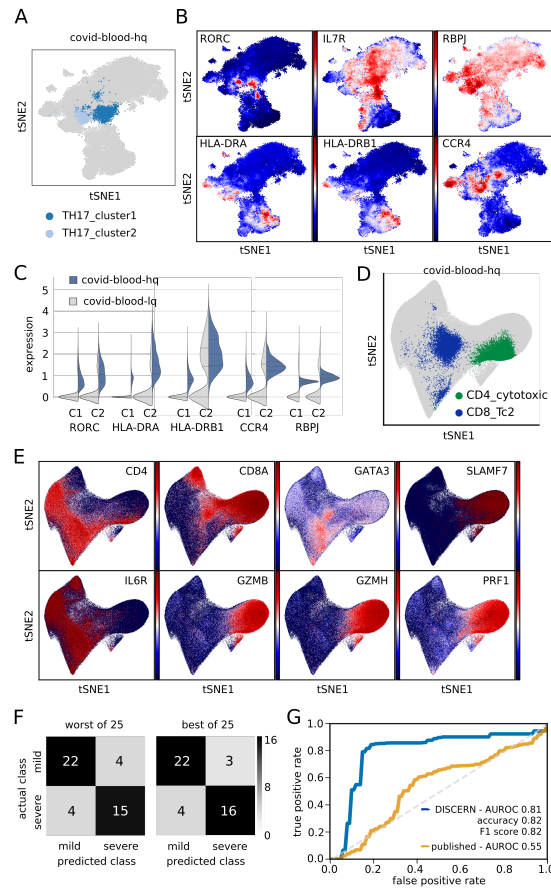

Figure 4: *Expression reconstruction improves COVID-19 cell type identification and allows for efficient disease severity prediction.* Two COVID-19 blood datasets were reconstructed and analyzed. Hamburg covid-blood-lq and covid-lung-lq data was reconstructed using bulk-hq data, resulting in the respective -hq datasets. Similarly, Cambridge covid-blood-severity-lq data, which contains disease severity information, was reconstructed using bulk-hq data. **A:** t-SNE representation of TH17 subclusters using reconstructed covid-blood-hq data. Clusters were defined using the leiden clustering algorithm on CD4<sup>+</sup> T cells. **B:** t-SNE representation colored by expression of reconstructed genes distinguishing TH17\_cluster1 and TH17\_cluster2 cells. TH17\_cluster1 displays a central memory and TH17\_cluster2 a more activated phenotype. **C:** Violin plots of expression levels for genes distinguishing TH17\_cluster1 (C1) and TH17\_cluster2 (C2) cells before (covid-blood-lq) and after (covid-blood-hq) reconstruction with DISCERN. **D:** Rare and unexpected cell types found in the reconstructed covid-blood-hq data with covid-blood-severity and bulk data. Cytotoxic CD4<sup>+</sup> T cells (CD4\_cytotoxic) are displayed in green, CD8<sup>+</sup> Tc2 helper cells (CD8\_Tc2) in blue, and all other cells in gray color. **E:** t-SNE representation of key marker genes in covid-blood-hq data for CD4\_cytotoxic and CD8\_Tc2 cells displayed in **D**. **F:** Best and worst confusion matrix for disease severity prediction using GBM classifiers trained on fractions of five T cell types (CD4\_CM, CD4\_cytotoxic, CD4\_naive, CD8\_EM, CD8\_effector) using reconstructed covid-blood-severity-hq data. Category “critical” was combined with “severe” and “asymptomatic” with “mild”. **G:** ROC curve of the GBM predictions outlined in **F** using reconstructed (blue color) covid-blood-severity-hq (CD4\_CM, CD4\_cytotoxic, CD4\_naive, CD8\_EM, CD8\_effector) and published T cell information from uncorrected (yellow color) data (CD4\_CM, CD4\_Tfh, CD8\_EM, NKT, Treg). Confidence intervals (color shades) indicate one standard deviation.

781

782

## 783 4. Methods

### 784 4.1. Data availability

785 In this manuscript many different scRNA-seq and RNA-seq datasets were  
786 used. A comprehensive overview of dataset, method, cell type, origin, size, and  
787 naming convention can be found in Tables S1 to S3. All datasets are publicly  
788 available as listed in Table S1.

### 789 4.2. Dataset description

790 *Pancreas.* The pancreas dataset is a collection of different scRNA-seq datasets,  
791 profiling pancreas cells in the context of diabetes [53]. The pancreas dataset is  
792 a widely used dataset for batch correction benchmark experiments and due to  
793 its high number of cell types and sequencing technologies it allows to evaluate  
794 differences between cells and sequencing technologies at the same time. The ex-  
795 pression table, including the annotation, is available from SeuratData ([https://](https://github.com/satijalab/seurat-data)  
796 [github.com/satijalab/seurat-data](https://github.com/satijalab/seurat-data)) as `panc8.SeuratData` (v3.0.2) [53]. The  
797 dataset was sequenced using five sequencing technologies (Smart-Seq2, Flu-  
798 idigm C1, CelSeq, CEL-Seq2, inDrop) and consists of 13 cell types (alpha, beta  
799 ,ductal, acinar, delta, gamma, activated\_stellate, endothelial, quiescent\_stellate,  
800 macrophage, mast, epsilon, schwann). In total, before preprocessing, the dataset  
801 contains 14 890 cells.

802 *difftec.* The difftec dataset was created for a systematic comparative analysis  
803 of scRNA-seq methods [54]. Similar to pancreas, the difftec dataset is ideal  
804 for the evaluation of expression reconstruction across many cell types and se-  
805 quencing technologies. Seven sequencing technologies (10x Chromium v2, 10x  
806 Chromium v3, Smart-Seq2, Seq-Well, inDrop, Drop-seq, CEL-Seq2) were used  
807 with at least two replicates each. In this dataset 10 different cell types (Cy-  
808 tototoxic T cell, CD4<sup>+</sup> T cell, CD14<sup>+</sup> monocyte, B cell, Natural killer cell,  
809 Megakaryocyte, CD16<sup>+</sup> monocyte, Dendritic cell, Plasmacytoid dendritic cell,  
810 Unassigned) were annotated, and make up for 31 021 cells in total before filter-  
811 ing. The expression table including the annotation is available from SeuratData  
812 as `pbmcsca.SeuratData` (v3.0.0).

813 *snRNA & scRNA.* The dataset was created for the validation of a single cell  
814 and single nuclei analysis toolbox [28]. Since snRNA-seq and scRNA-seq data  
815 varies in the amount of counts per cell and the genes detected, we tested if  
816 DISCERN could reconstruct snRNA-seq expression so that it would closely  
817 resemble scRNA-seq expression, providing a biological ground-truth. While we  
818 label snRNA-seq data as `lq` and scRNA-seq as `hq`, this distinction is incorrect  
819 from a biological perspective, as gene expression should be in part different  
820 between the nucleus and the cytosol. The dataset consists of a liver biopsy



821 sample (HTAPP-963) of metastatic breast cancer with single cell sequencing  
822 and single nuclei sequencing. Eight cell types (Epithelial cells, Macrophages,  
823 Hepatocytes, T cells, Endothelial cells, Fibroblasts, B cells, NK cells) were found  
824 in the original publication in a total of 12 423 cells. The data was sequenced  
825 using the Chromium V3 technology on a Illumina HiSeq X sequencer.

826 *covid-lung & covid-blood.* The COVID-19 dataset we have previously published  
827 consists of blood and bronchoalveolar lavage (BAL) samples from four patients  
828 with bacterial pneumonia and eight patients with SARS-CoV-2 infection[22].  
829 In total 155 706 cells were sequenced using TCR-seq technology, which allows  
830 for the comparison of clonal expansion in both tissues. While we investigated  
831 the lung data in detail in the original publication, the analysis of the blood was  
832 largely limited to cell type identification. Using DISCERN, we use the blood  
833 data to find previously unobserved cell types, link them to cell clones found in  
834 the lung, and derive a biomarker based on cell fractions (see also covid-blood-  
835 severity data). Cell type annotations for the BAL samples were used as in the  
836 original publication.

837 *citeseq.* This dataset contains CITE-seq information of healthy human PBMCs  
838 for 6 cell types (B cells, CD4 T cells, NK cells, CD14<sup>+</sup> Monocytes, FCGR3A<sup>+</sup>  
839 Monocytes, CD8 T cells) [29]. In our analyses we used the cell type information  
840 provided in the original publication [55]. The CITE-seq data is ideal to bench-  
841 mark DISCERN, as the information of 13 surface proteins offers ground-truth  
842 information on the cell types and a good proxy for the expression of the 13  
843 corresponding genes.

844 *bulk.* We used this large dataset of 28 FACS sorted and bulk sequenced immune  
845 cell types as ‘ultimate’ hq reference data for lq immune single cell sequencing  
846 data. Each of the 9852 samples provides an average expression information for  
847 13 104 genes for a specific immune cell type, providing a hq reference for e.g. lq  
848 single cell PBMC CITE-seq data with only 798 expressed genes per cell. We  
849 further assume that this dataset is large enough to provide enough per cell type  
850 variability for our deep neural network to faithfully learn and represent its gene  
851 expression. In more detail, the dataset consists of 28 sorted immune cell types  
852 (Naive CD4, Memory CD4, TH1, TH2, TH17, Tfh, Fr. I nTreg, Fr. II eTreg,  
853 Fr. III T, Naive CD8, Memory CD8, CM CD8, EM CD8, TEMRA CD8, NK,  
854 Naive B, USM B, SM B, Plasmablast, DN B, CL Monocytes, Int Monocytes,  
855 NC Monocytes, mDC, pDC, Neutrophils, LDG) with  $\geq$  99% purity [44]. Total  
856 RNA was extracted using RNeasy Micro Kits (QIAGEN). Libraries for RNA-seq  
857 were prepared using SMART-seq v4 Ultra Low Input RNA Kit (Takara Bio).  
858 In total, the dataset contains 9852 samples collected in two phases from 416  
859 donors, out of which 79 are healthy. For training DISCERN, bulk TPM counts  
860 and all cell types were used if not stated otherwise.

861 *covid-blood-severity.* This dataset is an aggregation of three COVID-19 sequenc-  
862 ing studies using the 10X Genomics Chromium Single Cell 5’ v1.1 technology.

863 It contains a large number of cell types with fine-grained cell type annotations  
864 that are complemented with information on COVID-19 disease severity for each  
865 patient sequenced. We used this dataset to obtain a blood-based biomarker of  
866 COVID-19 disease severity, based on T cell fractions observed with DISCERN.  
867 The data consists of PBMCs from 29 healthy, 89 COVID-19 and 12 LPS-treated  
868 patients. The authors detected 51 cell types in their original work (see Ta-  
869 ble S1) [43] and COVID-19 patients were classified by their disease severity  
870 (worst clinical outcome) into ‘asymptomatic’, ‘mild’, ‘moderate’, ‘severe’, ‘crit-  
871 ical’, and ‘death’. Count data together with CITE-seq information was used  
872 as provided in the original publication ([https://covid19.cog.sanger.ac.uk/  
873 submissions/release1/haniffa21.processed.h5ad](https://covid19.cog.sanger.ac.uk/submissions/release1/haniffa21.processed.h5ad)).

874 *kidney-lq (snRNA-seq) & kidney-hq (scRNA-seq)*. The kidney dataset consists  
875 of single cell RNA-seq and single nuclei RNA-seq data of 9 patients with acute  
876 kidney injury sequenced using 10X Genomics Chromium technology. It contains  
877 in total 82 701 cells with 52 934 cells sequenced using snRNA-seq and 29 767 cells  
878 sequenced using scRNA-seq. The dataset does not contain cell type annotation,  
879 but in initial analysis using a different subset [56] suggested that identification  
880 of T cells in the snRNA-seq data is challenging. For this reason, the analysis  
881 was focused on the detection of T cells and their subtypes.

#### 882 4.3. Code availability

883 All original code has been deposited at github.com ([https://github.com/  
884 imsb-uke/discern](https://github.com/imsb-uke/discern)) and is publicly available as of the date of publication. Any  
885 additional information required to reanalyze the data reported in this paper is  
886 available from the lead contact upon request.

#### 887 4.4. Preprocessing

888 Raw expression data (Counts) preprocessing was performed as previously  
889 described [57] using the scanpy (v1.6.1, [58]) implementation. In particular,  
890 the intersection of genes between batches was used. The cells were filtered  
891 to a minimum of 10 genes per cell and a minimum of 3 cells per gene. Li-  
892 brary size normalization was performed to a value of 20 000 with subsequent  
893 log-transformation. As model input for DISCERN the genes were scaled to  
894 zero mean and unit variance. However, for all further evaluation the genes  
895 were scaled to their uncorrected mean and variance not considering the batch  
896 information.

#### 897 4.5. Description of DISCERN

898 DISCERN is based on a Wasserstein Autoencoder with several added and  
899 modified features. We will describe the details of DISCERN’s architecture in  
900 the next paragraphs and a compact representation can be found in Figure S1B.

901 *Wasserstein Autoencoder.* While neural network-based autoencoders have been  
902 widely used for decades for dimensionality reduction [59, 60], recent advances  
903 have also allowed their use to build a generative model of the distribution of  
904 the data at hand[61]. More recently, leveraging results from optimal transport  
905 [62], Wasserstein Generative Adversarial Networks (WGAN) [63] and Wasser-  
906 stein Autoencoders (WAE) [23] have been designed to explicitly minimize the  
907 (Wasserstein, or earth-mover) distance between the distribution of the input  
908 data and their reconstruction. WGANs only implicitly encode their input into  
909 a latent representation (called latent code), while WAE has the useful property  
910 of using an explicit encoder, which makes it possible for the model to directly  
911 manipulate the different representations of single-cell data. Finally, the WAE  
912 framework, established in [23], allows the use of a wide range of architecture and  
913 losses, which we are going to detail now. First of all, in order to effectively use a  
914 number of latent dimensions that adaptively matches the intrinsic dimension of  
915 the scRNA-seq data at hand, DISCERN uses a random encoder as prescribed  
916 in [64].

917 *Architecture.* Autoencoders widely used for transcriptomics applications are  
918 shown to perform well on several tasks, like drug perturbation prediction [21]  
919 or dropout imputation [12]. Since the ordering of the genes in scRNA-seq  
920 matrices is mostly arbitrary, fully-connected layers are usually used in this task.  
921 In our case, DISCERN consists of three fully connected layers in the encoder  
922 and the decoder. The bottleneck of the autoencoder (or latent space) contains  
923 48 neurons, which is sufficient to accurately model all the datasets we used in  
924 our experiments. Additionally, we exploit a finding from [64] to let the net-  
925 work learn the appropriate amount of latent dimensions. While the encoder  
926 will be tasked to transform the distribution of the input data into a fixed,  
927 low-dimensional prior distribution (i.e. a standard Gaussian), the decoder will  
928 perform the opposite, i.e. transforming the fixed, low-dimensional prior distri-  
929 bution into gene space. scRNA-seq data is known to display a high level of zero  
930 measurements, called dropout, which is essential to accurately model the count  
931 distribution. To describe scRNA-seq data in a parametric way, it is common to  
932 model the expression level of a gene with zero-inflated negative binomial dis-  
933 tribution [65]. Despite the several non-linearities in the decoder architecture,  
934 it is, however, difficult to learn an encoding function that maps a simple prior  
935 to the distribution leading to low quality modeling of low expressed genes. To  
936 address this issue, we scale the gene expression and attach a second head to the  
937 decoder (i.e. a second decoder sharing all weights with the first, except for the  
938 last layer). The task of the second decoder head is to predict, for each gene  
939 of a cell, the probability of its expression to be dropped out, giving rise to a  
940 random decoder. Thus, this second decoder head predicts dropout probabili-  
941 ties and models the dropout probabilities for different batches. This additional  
942 head allows modeling the dropout and the expression independently, to capture  
943 the specific distribution of single cell data without the need for further explicit  
944 assumption about the distribution.

945 *Loss function.* The loss optimized during the training of DISCERN is composed of four terms: a data-fitting (or reconstruction) loss, a dropout fitting  
946 (cross entropy) loss, a prior-fitting term (ensuring that DISCERN approximately minimizes the Wasserstein distance) and a variance penalty term (that  
947 controls the randomness of the encoder). Thus, DISCERN can be considered as a Wasserstein Autoencoder as introduced in [23]. For the reconstruction term,  
948 the framework introduced in [23] allows the use of any positive cost function. We elected to use the Huber loss [66] as it is well suited for modeling scaled  
949 scRNA-seq expression data, because it allows to select a threshold value to give lower weight to high differences in highly expressed genes and thus allows the  
950 model to learn a more robust expression estimate without focusing too much on outlier values. For the prior-fitting term, following [23], DISCERN uses the  
951 Maximum Mean Discrepancy (MMD) [67] between the aggregate posterior (i.e. the distribution of the input single-cells after encoding) and a standard Gaussian.  
952 We use the sum over an inverse multiquadratic kernel with different sizes for this task. Then, to prevent the random encoder (with diagonal covariance)  
953 from collapsing to a deterministic one, a penalty term that enforces that some components of the variance are close to 1. Intuitively, that means that the superfluous  
954 latent dimensions will only contain random noise (see [64] for more details). Another loss term, namely the binary cross-entropy loss, on the second  
955 decoder head is used to enable the model to learn a dropout probability for each gene and sample. The loss on the dropout layer enables the model to capture  
956 the bimodal distribution of single cell data. Additionally, activity regularization is applied on the Conditional Layer Normalization (CLN), such that the weights  
957 of the conditional layers are only regularized in a batch-specific manner and the regularization is not applied for batches, which are not present in the current  
958 mini-batch. This has the advantage that the batch dependent weights are not influenced too much by different batch sizes. The four loss terms are added (and  
959 weighed) together to form the loss that DISCERN minimizes during training (see also Figure S1 for loss terms).

975 *Conditional Layer Normalization.* The weights of those fully-connected layers are shared for all the batches that DISCERN is trained on. However, to model  
976 the batch-specific differences, we use a Conditional Layer Normalization (CLN) that applies the idea proposed in [25] to Layer Normalization [26]. In essence,  
977 for each batch, different sets of shifting factors are learned. Note that in DISCERN, no scaling factors are used to limit the expressivity of the conditioning  
978 and therefore reduce the chance of over integration. This allows not only to accurately model the batch-specific differences between batches, but also to transfer  
979 the batch effect from one dataset onto another, in the spirit of the style-transfer approach developed in [25]. To make things clear, DISCERN does not explicitly  
980 train to integrate datasets. Instead, it trains to accurately model the input data, capturing the batch-specific differences with the weights of the CLN layers  
981 (i.e. conditioning), and the biological signal (which is mostly shared across the batches to integrate) with the weights of the fully-connected layers. After training,  
982 we encode all the cells we want to reconstruct, conditioning the process on

990 their batch of origin. Then, we take the batch chosen by the user and proceed to  
991 decode all the cells conditioning on that specific batch, effectively transferring  
992 the batch effect of one specific batch onto all of the batches we want to integrate  
993 and reconstruct.

994 *Activations & dropout.* With the exception of the output layer, every other  
995 fully-connected layer of the encoder and the decoder was followed by a CLN,  
996 a Mish ([68]) activation function, and dropout during model training to reduce  
997 overfitting.

998 *Optimization.* To optimize the weights of our model, DISCERN uses Rectified  
999 Adam ([69]), which addresses some of the shortcomings of the widely used Adam  
1000 [70] and generally yields more stable training. To prevent overfitting, the op-  
1001 timization is stopped early. It is implemented as a modification of the Keras  
1002 EarlyStopping (with parameter minDelta set to 0.01 and the patience to 30)  
1003 where the callback is delayed by a fixed number of 5 epochs. The delay was  
1004 implemented to prevent too early stopping due to the optimization procedure.

#### 1005 4.6. Hyperparameters

1006 As outlined in the architecture section of the methods and depicted in Fig-  
1007 ure S1, DISCERN features several learnable hyperparameters. The complexity  
1008 of the hyperparameter search space is a potential downside of DISCERN, if  
1009 these hyperparameters would be unstable across different datasets or in other  
1010 words, would require constant tuning. Fortunately, DISCERN’s hyperparame-  
1011 ters are very stable across the multitude of datasets tested in this manuscript,  
1012 which we will outline in this paragraph. Naturally, there is no rule without an  
1013 exception, which in this manuscript are the COVID-19 datasets that required  
1014 optimization for several hyperparameters.

1015 *Constant hyperparameters.* DISCERN features a number of hyper-parameters  
1016 that can be tuned through hyperparameter optimization (see below for details).  
1017 Most of them have default values that yield reasonable performance across the  
1018 different datasets we used and are being kept constant across experiments, in-  
1019 cluding the COVID-19 dataset. Those constant hyperparameters are: the choice  
1020 of the reconstruction loss (Huber loss), activation functions (Mish), CLN for the  
1021 conditioning, number of fully-connected layers (3) and their size (1024, 512, 256  
1022 and 256, 512, 1024 neurons for the encoder and the decoder respectively), num-  
1023 ber of latent dimensions (48), learning rate ( $1 \times 10^{-3}$ ), decay rates  $\beta_1$  and  $\beta_2$  of  
1024 Rectified Adam (0.85 and 0.95 respectively), batch size (192), label smoothing  
1025 for our custom cross entropy loss (0.1), dropout rates (0.4 in the encoder and 0  
1026 in the decoder), delta parameter of the Huber loss (9.0), weight on the penalty  
1027 on the randomness of the encoder  $\lambda_{\text{sigma}}$  ( $1 \times 10^{-8}$ ), weight on the cross entropy  
1028 loss term  $\lambda_{\text{dropout}}$  ( $1 \times 10^5$ ), weight on the MMD penalty term  $\lambda_{\text{prior}}$  (1500).

1029 *Dataset-specific hyperparameters.* The optimal value of the L2 regularization  
1030 applied on the weights of our custom CLN highly depends on the dataset at hand  
1031 and thus requires dataset-specific tuning. For datasets with a very small vari-  
1032 ance in cell compositions the L2 CLN regularization can be turned off (weight  
1033 set to 0). When datasets have different compositions the L2 CLN regularization  
1034 requires higher values (typically between  $1 \times 10^{-3}$  and 0.2).

1035 *COVID-19 hyperparameters.* For the experiments with COVID-19 datasets slightly  
1036 adjusted hyperparameters were used: learning rate of 6e-3, label smoothing for  
1037 our custom crossentropy loss of 0.05, weight on the penalty on the randomness  
1038 of the encoder  $\lambda_{sigma}$  (1e-4), weight on the cross entropy loss term  $\lambda_{dropout}$   
1039 (2e3), weight on the MMD penalty term  $\lambda_{prior}$  (2000).

1040 *Hyperparameter optimization.* DISCERN implements different techniques for  
1041 hyperparameter optimization by using the ray[tune] library [71]. For most use  
1042 cases the model does not require hyperparameter tuning and the default pa-  
1043 rameter should be sufficient. However, DISCERN has a generic interface and  
1044 supports nearly all techniques implemented in ray[tune]. The initial hyperpa-  
1045 rameters were found using grid search. The loss used for the hyperparameter  
1046 selection is the classification performance of a Random Forest classifier trying  
1047 to classify real vs. auto-encoded cells. Classification performance was mea-  
1048 sured using the area under the receiver operating characteristic curve (AUC /  
1049 AUROC).

#### 1050 4.7. Competing algorithms and methods

1051 We briefly discuss competing methods and have compared their performance  
1052 to DISCERN in the results section. These algorithms can be grouped into two  
1053 categories, i) imputation algorithms that were developed to estimate drop-out  
1054 gene expression based on dataset inherent information (MAGIC, DCA, scIm-  
1055 pute) and ii) algorithms designed for batch correction that we have modified  
1056 or extended to reconstruct gene expression, although this is not their intended  
1057 use (Seurat, scGen). Given the latter, it is clear that DISCERN could be used  
1058 purely for batch correction in latent space, a subject beyond the scope of this  
1059 manuscript.

1060 *MAGIC.* [13] Markov affinity-based graph imputation of cells (MAGIC) de-  
1061 noises and imputes the single-cell count matrix using data diffusion-based in-  
1062 formation sharing. The construction of a good similarity metric is challenging  
1063 for finding biologically similar cells due to high sparsity. MAGIC finds a good  
1064 similarity metric using a sophisticated graph-based approach that builds less-  
1065 noisy cell-cell affinities and information sharing across cells. A particular focus  
1066 of MAGIC was to understand gene-gene relationships and to characterize other  
1067 dynamics in biological systems. MAGIC is provided as a Python package.

1068 *DCA*. [11] Deep count autoencoder (DCA) is a deep learning-based method for  
1069 denoising single-cell count matrices. DCA is implemented in Python and uses  
1070 an autoencoder with a Zero-Inflated Negative Binomial (ZINB) loss function.  
1071 For each gene, DCA computes gene-specific parameters of ZINB distribution,  
1072 namely dropout, dispersion and mean. By modeling gene distributions as a noise  
1073 model and also computing dropout probabilities of each gene, DCA is able to  
1074 denoise and impute the missing counts by identifying and correcting dropout  
1075 events.

1076 *scImpute*. [12] Similarly to MAGIC, scImpute focuses on identifying cells that  
1077 are similar, which is challenging due to the high sparsity of single-cell count  
1078 matrices. scImpute is a statistical model using a three step process to impute  
1079 scRNA-seq data. In the first step spectral clustering is applied on principal com-  
1080 ponents to find neighbors, which later can be used to detect and impute dropout  
1081 values. In the second step scImpute fits a mixture model of a Gamma distribu-  
1082 tion and a Normal distribution to distinguish technical and biological dropouts.  
1083 In the last step, the model uses a regression model for each cell to impute the  
1084 expression of genes with high probability of dropout. With this approach, scIm-  
1085 pute avoids hallucinations and keeps the gene expression distribution. scImpute  
1086 is provided as an R package.

1087 *Seurat*. [24] Seurat is an open-source toolkit for the analysis of single cell  
1088 RNA-sequencing data. In addition to general analysis functions, Seurat of-  
1089 fers batch-correction functionality. Seurat uses canonical correlation analysis  
1090 to construct this lower dimensional representation and tries to find neighbors  
1091 between batches in this shared space. These anchors are filtered considering  
1092 the local neighborhood of the cell pairs and remaining anchors are finally used  
1093 to construct correction vectors for all cells in this low dimensional representa-  
1094 tion. While Seurats is intended to work in a lower dimensional representation,  
1095 it can also be used to reconstruct the expression information from this lower  
1096 dimensional representation. Seurat is provided as an R package.

1097 *scGen*. [21] scGen is a variational autoencoder based deep learning method with  
1098 a focus on learning features that help distinguish responding and non-responding  
1099 genes and cells. scGen constructs a latent space in which it estimates perturba-  
1100 tion vectors associated with a change between different conditions. Since scGen  
1101 models the perturbation and infection responses in single cells, it is focused on  
1102 in-silico screening with the use of cells coming from healthy samples. It can also  
1103 be used for batch correction. For batch correction, and unlike DISCERN or  
1104 Seurat, scGen uses both batch and cell type labels.

1105 *Multigrade*. [17] multigrade is an autoencoder based deep learning method de-  
1106 veloped for the integration of different modalities to improve single cell RNA-seq  
1107 downstream analysis, mainly clustering. The main focus is the integration of  
1108 CITE-seq protein abundance since it is often available together with scRNA-  
1109 seq. They use individual encoders for each modality and build a shared latent

1110 representation by partially sharing the decoder. Multigrade is built using the  
1111 scvi-tools toolbox and implemented in python and pytorch.

#### 1112 *4.8. Evaluation metrics*

1113 *t-SNE & UMAP.* For visualization of the datasets and to qualitatively assess  
1114 the integration performance tSNE and UMAP were used. Both methods are  
1115 based on PCA representation and use non-linear representations to create a 2D  
1116 representation of the data. We used the scanpy [58] implementation. Default  
1117 settings were used in nearly all cases except: In the combined COVID-19 dataset  
1118 analogue to Kobak *et al.*[72] the dataset was subset to 25 000 cells and tSNE  
1119 was computed using a perplexity of 250, and a learning rate of 25 000/12. These  
1120 positions were taken and used as input to tSNE of all cells using a perplexity  
1121 of 30 a learning rate of (number of observations)/12 and a late exaggeration of  
1122 4.0 using FIt-SNE [73]. Clustering was performed using PARC [74] with de-  
1123 fault parameters except `dist_std_local=1.5` and `small_pop=300`. Methods were  
1124 changed here due to computation time issues for 350 000 cells. covid-blood data  
1125 was analyzed using a learning rate of (number of observations)/6 a perplexity  
1126 of (number of observations)/120 and `early_exaggeration=4`. Clustering was per-  
1127 formed using default parameters except `knn=100` and `small_pop=100` to reduce  
1128 the number of clusters with limited cell number. Clustering of the T helper cells  
1129 in healthy blood was performed using coarse clustering with 30 nearest neigh-  
1130 bors and leiden clustering (<https://github.com/vtraag/leidenalg>) with a  
1131 resolution of 0.6. Afterwards a combined cluster of IFN-regulated and TREG  
1132 was reclustered using a resolution of 0.4 and effector T cells were reclustered us-  
1133 ing a resolution of 0.8. Resolution was chosen to dissect the raw gene expression  
1134 changes of known cell types.

1135 *Mean gene expression.* Mean gene expression was calculated as average over  
1136 log-normalized expression over all cells, usually stratified by celltype. This eval-  
1137 uation of expression data consists of many data points where several have values  
1138 close to zero, but could have a high weight on rank-based correlation methods.  
1139 Thus Pearson correlation was used to evaluate the performance.

1140 *Differential gene expression.* Differential gene expression was performed using  
1141 the scanpy [58] `rank_gene_groups` function using the t-test method for calculat-  
1142 ing statistical significance on log-normalized expression data. Differential gene  
1143 expression analysis was always performed under consideration of the cell type  
1144 information. For comparison of differential gene expression analysis between  
1145 conditions, the Pearson correlation was used. It is calculated either on the log2  
1146 fold-change or in most cases on the t-statistics, computed during significance  
1147 estimation. The data was compared using the t-statistics, because it aggregates  
1148 information on both the variance and the change in mean expression. Thus it  
1149 allows, roughly speaking, for simultaneously evaluating the significance and the  
1150 log2 fold change.



1151 *Pathway analysis.* Pathway analysis or gene set enrichment analysis was done  
1152 using the prerank function from gseapy [75] on the t-statistics, computed as  
1153 described in the ‘Differential gene expression’ section of the methods. To this  
1154 end, the gene set library “KEGG\_2019\_Human” provided by enrichr [76] was  
1155 used. Top pathways were selected using the normalized enrichment score as  
1156 previously described [75].

1157 *Gene regulation.* [38] The python implementation of the SCENIC (pySENIC)  
1158 was used to infer regulons specific for CD4<sup>+</sup> T helper cells. SCENIC infers a  
1159 gene regulatory network using GRNBoost2 and creates co-expression modules.  
1160 The co-expression modules get associated with transcription factors using the  
1161 transcription factor motif discovery tool RcisTarget. A pair of transcription  
1162 factor and associated gene set is called a regulon. For each cell, the regulons  
1163 get scored using the AUCCell algorithm to examine if a cell is affected by the  
1164 regulon. We used default parameters of the pySENIC implementation.

#### 1165 *COVID-19 classification*

1166 To evaluate the importance of the cell types found in the covid-blood-  
1167 severity-hq dataset after reconstruction with DISCERN, the fraction for all  
1168 T cell subtypes was used to predict the disease severity, as provided in [43].  
1169 The data was classified using a Gradient boosting classifier ([77], implemented  
1170 in scikit-learn v1.0.2, default settings) using 25 rounds of leave-one-out cross-  
1171 validation (LOOCV). Each round consists of n training-prediction iterations  
1172 with  $n - 1$  samples for training and 1 sample for testing, such that after one  
1173 round prediction results for all n samples could be evaluated. We chose LOOCV  
1174 over k-fold cross-validation and testing due to the limited size of the dataset,  
1175 consisting of only 71 patients. We used pycm ([78], v3.3) for the performance  
1176 evaluation. The final evaluation was done using the accuracy and F1 score  
1177 as provided by pycm. The area under the receiver operating characteristic  
1178 (AUROC) curve is computed with scikit-learn. Before training the classifiers  
1179 a forward feature selection was performed using the SequentialFeatureSelector  
1180 implemented in scikit-learn with default parameters. In total four experiments  
1181 were performed. In the first experiment, classification with three disease cat-  
1182 egories (mild, moderate, severe) was used. Patients who died were excluded.  
1183 For the other two experiments only patients with asymptomatic, mild, severe  
1184 and critical symptoms were included. In all experiments the asymptomatic and  
1185 mild category was merged to mild and severe and critical to severe.

## 1186 **References**

- 1187 [1] N. Editorial, Method of the year 2013, Nat. Methods 11 (1) (2014) 1.
- 1188 [2] Y. Zhao, U. Panzer, S. Bonn, C. F. Krebs, Single-cell biology to decode  
1189 the immune cellular composition of kidney inflammation, Cell and tissue  
1190 research 385 (2) (2021) 435–443.

- 1191 [3] M. Stoeckius, C. Hafemeister, W. Stephenson, B. Houck-Loomis, P. K.  
1192 Chattopadhyay, H. Swerdlow, R. Satija, P. Smibert, Simultaneous epi-  
1193 tope and transcriptome measurement in single cells, *Nature methods* 14 (9)  
1194 (2017) 865–868.
- 1195 [4] A. A. Tu, T. M. Gierahn, B. Monian, D. M. Morgan, N. K. Mehta,  
1196 B. Ruiters, W. G. Shreffler, A. K. Shalek, J. C. Love, Tcr sequencing paired  
1197 with massively parallel 3' rna-seq reveals clonotypic t cell signatures, *Nature*  
1198 *immunology* 20 (12) (2019) 1692–1699.
- 1199 [5] J. A. Pai, A. T. Satpathy, High-throughput and single-cell t cell receptor  
1200 sequencing technologies, *Nature Methods* 18 (8) (2021) 881–892.
- 1201 [6] S. Oller-Moreno, K. Kloiber, P. Machart, S. Bonn, Algorithmic advances  
1202 in machine learning for single-cell expression analysis, *Current Opinion in*  
1203 *Systems Biology* 25 (2021) 27–33.
- 1204 [7] D. Lähnemann, J. Köster, E. Szczurek, D. J. McCarthy, S. C. Hicks, M. D.  
1205 Robinson, C. A. Vallejos, K. R. Campbell, N. Beerenwinkel, A. Mahfouz,  
1206 et al., Eleven grand challenges in single-cell data science, *Genome biology*  
1207 21 (1) (2020) 1–35.
- 1208 [8] X. Wang, Y. He, Q. Zhang, X. Ren, Z. Zhang, Direct comparative analyses  
1209 of 10x genomics chromium and smart-seq2, *Genomics, proteomics &*  
1210 *bioinformatics* 19 (2) (2021) 253–266.
- 1211 [9] A. K. Shalek, R. Satija, J. Shuga, J. J. Trombetta, D. Gennert, D. Lu,  
1212 P. Chen, R. S. Gertner, J. T. Gaublomme, N. Yosef, et al., Single-cell  
1213 rna-seq reveals dynamic paracrine control of cellular variation, *Nature*  
1214 510 (7505) (2014) 363–369.
- 1215 [10] W. Hou, Z. Ji, H. Ji, S. C. Hicks, A systematic evaluation of single-cell  
1216 rna-sequencing imputation methods, *Genome biology* 21 (1) (2020) 1–30.
- 1217 [11] G. Eraslan, L. M. Simon, M. Mircea, N. S. Mueller, F. J. Theis, Single-cell  
1218 rna-seq denoising using a deep count autoencoder, *Nature communications*  
1219 10 (1) (2019) 1–14.
- 1220 [12] W. V. Li, J. J. Li, An accurate and robust imputation method scimpute  
1221 for single-cell rna-seq data, *Nature communications* 9 (1) (2018) 1–9.
- 1222 [13] D. Van Dijk, R. Sharma, J. Nainys, K. Yim, P. Kathail, A. J. Carr, C. Bur-  
1223 dziak, K. R. Moon, C. L. Chaffer, D. Pattabiraman, et al., Recovering gene  
1224 interactions from single-cell data using data diffusion, *Cell* 174 (3) (2018)  
1225 716–729.
- 1226 [14] Z.-H. Wen, J. L. Langsam, L. Zhang, W. Shen, X. Zhou, A bayesian fac-  
1227 torization method to recover single-cell rna sequencing data, *Cell reports*  
1228 *methods* 2 (1) (2022) 100133.

- 1229 [15] T. Peng, Q. Zhu, P. Yin, K. Tan, Scrabble: single-cell rna-seq imputation  
1230 constrained by bulk rna-seq data, *Genome biology* 20 (1) (2019) 1–12.
- 1231 [16] Z. Hu, S. Zu, J. S. Liu, Simples: a single-cell rna sequencing imputation  
1232 strategy preserving gene modules and cell clusters variation, *NAR genomics  
1233 and bioinformatics* 2 (4) (2020) lqaa077.
- 1234 [17] M. Lotfollahi, A. Litinetskaya, F. J. Theis, Multigrate: single-cell multi-  
1235 omic data integration, *bioRxiv* (2022).
- 1236 [18] K. E. Wu, K. E. Yost, H. Y. Chang, J. Zou, Babel enables cross-modality  
1237 translation between multiomic profiles at single-cell resolution, *Proceedings  
1238 of the National Academy of Sciences* 118 (15) (2021).
- 1239 [19] K. D. Yang, A. Belyaeva, S. Venkatachalapathy, K. Damodaran, A. Kat-  
1240 coff, A. Radhakrishnan, G. Shivashankar, C. Uhler, Multi-domain transla-  
1241 tion between single-cell imaging and sequencing data using autoencoders,  
1242 *Nature Communications* 12 (1) (2021) 1–10.
- 1243 [20] M. Marouf, P. Machart, V. Bansal, C. Kilian, D. S. Magruder, C. F. Krebs,  
1244 S. Bonn, Realistic in silico generation and augmentation of single-cell rna-  
1245 seq data using generative adversarial networks, *Nature communications*  
1246 11 (1) (2020) 1–12.
- 1247 [21] M. Lotfollahi, F. A. Wolf, F. J. Theis, scgen predicts single-cell perturbation  
1248 responses, *Nature methods* 16 (8) (2019) 715–721.
- 1249 [22] Y. Zhao, C. Kilian, J.-E. Turner, L. Bosurgi, K. Roedl, P. Bartsch, A.-C.  
1250 Gnirck, F. Cortesi, C. Schultheiß, M. Hellmig, et al., Clonal expansion and  
1251 activation of tissue-resident memory-like th17 cells expressing gm-csf in the  
1252 lungs of patients with severe covid-19, *Science Immunology* 6 (56) (2021)  
1253 eabf6692.
- 1254 [23] I. Tolstikhin, O. Bousquet, S. Gelly, B. Schoelkopf, Wasserstein auto-  
1255 encoders, *arXiv preprint arXiv:1711.01558* (2017).
- 1256 [24] T. Stuart, A. Butler, P. Hoffman, C. Hafemeister, E. Papalexi, W. M.  
1257 Mauck III, Y. Hao, M. Stoeckius, P. Smibert, R. Satija, Comprehensive  
1258 integration of single-cell data, *Cell* 177 (7) (2019) 1888–1902.
- 1259 [25] V. Dumoulin, J. Shlens, M. Kudlur, A learned representation for artistic  
1260 style, *arXiv preprint arXiv:1610.07629* (2016).
- 1261 [26] J. L. Ba, J. R. Kiros, G. E. Hinton, Layer normalization, *arXiv preprint  
1262 arXiv:1607.06450* (2016).
- 1263 [27] Z. Fu, E. R. Gilbert, D. Liu, Regulation of insulin synthesis and secretion  
1264 and pancreatic beta-cell dysfunction in diabetes, *Current diabetes reviews*  
1265 9 (1) (2013) 25–53.

- 1266 [28] M. Slyper, C. Porter, O. Ashenberg, J. Waldman, E. Drokhylyansky,  
1267 I. Wakiro, C. Smillie, G. Smith-Rosario, J. Wu, D. Dionne, et al., A single-  
1268 cell and single-nucleus rna-seq toolbox for fresh and frozen human tumors,  
1269 *Nature medicine* 26 (5) (2020) 792–802.
- 1270 [29] G. C. Linderman, J. Zhao, M. Roulis, P. Bielecki, R. A. Flavell, B. Nadler,  
1271 Y. Kluger, Zero-preserving imputation of single-cell rna-seq data, *Nature*  
1272 *Communications* 13 (1) (2022) 1–11.
- 1273 [30] E. Bakos, C. A. Thaiss, M. P. Kramer, S. Cohen, L. Radomir, I. Orr,  
1274 N. Kaushansky, A. Ben-Nun, S. Becker-Herman, I. Shachar, Ccr2 regulates  
1275 the immune response by modulating the interconversion and function of  
1276 effector and regulatory t cells, *The Journal of Immunology* 198 (12) (2017)  
1277 4659–4671.
- 1278 [31] G. Monaco, B. Lee, W. Xu, S. Mustafah, Y. Y. Hwang, C. Carré, N. Burdin,  
1279 L. Visan, M. Ceccarelli, M. Poidinger, et al., Rna-seq signatures normalized  
1280 by mrna abundance allow absolute deconvolution of human immune cell  
1281 types, *Cell reports* 26 (6) (2019) 1627–1640.
- 1282 [32] V. A. Traag, L. Waltman, N. J. Van Eck, From louvain to leiden: guaran-  
1283 teeing well-connected communities, *Scientific reports* 9 (1) (2019) 1–12.
- 1284 [33] M. Croft, Control of immunity by the tnfr-related molecule ox40 (cd134),  
1285 *Annual review of immunology* 28 (2009) 57–78.
- 1286 [34] T. Riaz, L. M. Sollid, I. Olsen, G. A. de Souza, Quantitative proteomics of  
1287 gut-derived th1 and th1/th17 clones reveal the presence of cd28+ nkg2d-  
1288 th1 cytotoxic cd4+ t cells, *Molecular & Cellular Proteomics* 15 (3) (2016)  
1289 1007–1016.
- 1290 [35] L. Peng, Y. Chen, Q. Ou, X. Wang, N. Tang, Lncrna miat correlates with  
1291 immune infiltrates and drug reactions in hepatocellular carcinoma, *Inter-  
1292 national immunopharmacology* 89 (2020) 107071.
- 1293 [36] D. P. Saraiva, A. Jacinto, P. Borralho, S. Braga, M. G. Cabral, Hla-dr in  
1294 cytotoxic t lymphocytes predicts breast cancer patients’ response to neoad-  
1295 jvant chemotherapy, *Frontiers in immunology* (2018) 2605.
- 1296 [37] M. S. Lee, K. Hanspers, C. S. Barker, A. P. Korn, J. M. McCune, Gene  
1297 expression profiles during human cd4+ t cell differentiation, *International  
1298 immunology* 16 (8) (2004) 1109–1124.
- 1299 [38] S. Aibar, C. B. González-Blas, T. Moerman, V. A. Huynh-Thu, H. Im-  
1300 richova, G. Hulselmans, F. Rambow, J.-C. Marine, P. Geurts, J. Aerts,  
1301 et al., Scenic: single-cell regulatory network inference and clustering, *Nat-  
1302 ure methods* 14 (11) (2017) 1083–1086.

- 1303 [39] A. M. Thornton, J. Lu, P. E. Korty, Y. C. Kim, C. Martens, P. D. Sun,  
1304 E. M. Shevach, Helios+ and helios- treg subpopulations are phenotypically  
1305 and functionally distinct and express dissimilar tcr repertoires, *European*  
1306 *journal of immunology* 49 (3) (2019) 398–412.
- 1307 [40] C. Imbratta, H. Hussein, F. Andris, G. Verdeil, c-maf, a swiss army knife  
1308 for tolerance in lymphocytes, *Frontiers in immunology* 11 (2020) 206.
- 1309 [41] X. O. Yang, B. P. Pappu, R. Nurieva, A. Akimzhanov, H. S. Kang,  
1310 Y. Chung, L. Ma, B. Shah, A. D. Panopoulos, K. S. Schluns, et al., T  
1311 helper 17 lineage differentiation is programmed by orphan nuclear recep-  
1312 tors ror $\alpha$  and ror $\gamma$ , *Immunity* 28 (1) (2008) 29–39.
- 1313 [42] K. Street, D. Risso, R. B. Fletcher, D. Das, J. Ngai, N. Yosef, E. Purdom,  
1314 S. Dudoit, Slingshot: cell lineage and pseudotime inference for single-cell  
1315 transcriptomics, *BMC genomics* 19 (1) (2018) 1–16.
- 1316 [43] E. Stephenson, G. Reynolds, R. A. Botting, F. J. Calero-Nieto, M. D.  
1317 Morgan, Z. K. Tuong, K. Bach, W. Sungnak, K. B. Worlock, M. Yoshida,  
1318 et al., Single-cell multi-omics analysis of the immune response in covid-19,  
1319 *Nature medicine* 27 (5) (2021) 904–916.
- 1320 [44] M. Ota, Y. Nagafuchi, H. Hatano, K. Ishigaki, C. Terao, Y. Takeshima,  
1321 H. Yanaoka, S. Kobayashi, M. Okubo, H. Shirai, et al., Dynamic landscape  
1322 of immune cell-specific gene regulation in immune-mediated diseases, *Cell*  
1323 184 (11) (2021) 3006–3021.
- 1324 [45] G. Meyer Zu Horste, C. Wu, C. Wang, L. Cong, M. Pawlak, Y. Lee,  
1325 W. Elyaman, S. Xiao, A. Regev, V. Kuchroo, Rbpj controls development  
1326 of pathogenic th17 cells by regulating il-23 receptor expression. *cell rep* 16  
1327 (2): 392–404 (2016).
- 1328 [46] S. De Biasi, M. Meschiari, L. Gibellini, C. Bellinazzi, R. Borella, L. Fidanza,  
1329 L. Gozzi, A. Iannone, D. Lo Tartaro, M. Mattioli, et al., Marked t cell  
1330 activation, senescence, exhaustion and skewing towards th17 in patients  
1331 with covid-19 pneumonia, *Nature communications* 11 (1) (2020) 1–17.
- 1332 [47] B. J. Meckiff, C. Ramírez-Suástegui, V. Fajardo, S. J. Chee, A. Kurnadi,  
1333 H. Simon, S. Eschweiler, A. Grifoni, E. Pelosi, D. Weiskopf, et al., Imbal-  
1334 ance of regulatory and cytotoxic sars-cov-2-reactive cd4+ t cells in covid-19,  
1335 *Cell* 183 (5) (2020) 1340–1353.
- 1336 [48] L. Loyal, S. Warth, K. Jürchott, F. Mölder, C. Nikolaou, N. Babel,  
1337 M. Nienen, S. Durlanik, R. Stark, B. Kruse, et al., Slamf7 and il-6r define  
1338 distinct cytotoxic versus helper memory cd8+ t cells, *Nature communica-*  
1339 *tions* 11 (1) (2020) 1–12.
- 1340 [49] J. Yang, M. Zhong, E. Zhang, K. Hong, Q. Yang, D. Zhou, J. Xia, Y.-Q.  
1341 Chen, M. Sun, B. Zhao, et al., Broad phenotypic alterations and potential

- 1342 dysfunction of lymphocytes in individuals clinically recovered from covid-  
1343 19, *Journal of Molecular Cell Biology* 13 (3) (2021) 197–209.
- 1344 [50] M. Lotfollahi, M. Naghipourfar, M. D. Luecken, M. Khajavi, M. Büttner,  
1345 M. Wagenstetter, Ž. Avsec, A. Gayoso, N. Yosef, M. Interlandi, et al.,  
1346 Mapping single-cell data to reference atlases by transfer learning, *Nature*  
1347 *Biotechnology* 40 (1) (2022) 121–130.
- 1348 [51] C. Wagner, M. Griesel, A. Mikolajewska, A. Mueller, M. Nothacker,  
1349 K. Kley, M.-I. Metzendorf, A.-L. Fischer, M. Kopp, M. Stegemann, et al.,  
1350 Systemic corticosteroids for the treatment of covid-19, *Cochrane Database*  
1351 *of Systematic Reviews* (8) (2021).
- 1352 [52] W. Chen, J. Luo, Y. Ye, R. Hoyle, W. Liu, R. Borst, S. Kazani, E. A.  
1353 Shikatani, V. J. Erpenbeck, I. D. Pavord, et al., The roles of type 2 cyto-  
1354 toxic t cells in inflammation, tissue remodeling, and prostaglandin (pg) d2  
1355 production are attenuated by pgd2 receptor 2 antagonism, *The Journal of*  
1356 *Immunology* 206 (11) (2021) 2714–2724.
- 1357 [53] S. Lab, `panc8.SeuratData: Eight Pancreas Datasets Across Five Technolo-`  
1358 `gies, r package version 3.0.2` (2019).
- 1359 [54] J. Ding, X. Adiconis, S. K. Simmons, M. S. Kowalczyk, C. C. Hession,  
1360 N. D. Marjanovic, T. K. Hughes, M. H. Wadsworth, T. Burks, L. T.  
1361 Nguyen, et al., Systematic comparison of single-cell and single-nucleus rna-  
1362 sequencing methods, *Nature biotechnology* 38 (6) (2020) 737–746.
- 1363 [55] A. Gayoso, R. Lopez, G. Xing, P. Boyeau, K. Wu, M. Jayasuriya, E. Melh-  
1364 man, M. Langevin, Y. Liu, J. Samaran, et al., `Scvi-tools: A library for`  
1365 `deep probabilistic analysis of single-cell omics data`, *bioRxiv* (2021).
- 1366 [56] R. Menon, A. S. Bomback, B. B. Lake, C. Stutzke, S. M. Grewenow,  
1367 S. Menez, V. D. D’Agati, S. Jain, R. Knight, S. H. Lecker, et al., Inte-  
1368 grated single-cell sequencing and histopathological analyses reveal diverse  
1369 injury and repair responses in a participant with acute kidney injury:  
1370 a clinical-molecular-pathologic correlation, *Kidney International* 101 (6)  
1371 (2022) 1116–1125.
- 1372 [57] G. X. Zheng, J. M. Terry, P. Belgrader, P. Ryvkin, Z. W. Bent, R. Wilson,  
1373 S. B. Zivaldo, T. D. Wheeler, G. P. McDermott, J. Zhu, et al., Massively  
1374 parallel digital transcriptional profiling of single cells, *Nature communica-*  
1375 *tions* 8 (1) (2017) 1–12.
- 1376 [58] F. A. Wolf, P. Angerer, F. J. Theis, `Scanpy: large-scale single-cell gene`  
1377 `expression data analysis`, *Genome biology* 19 (1) (2018) 1–5.
- 1378 [59] Y. Le Cun, F. Fogelman-Soulié, Modèles connexionnistes de  
1379 l’apprentissage, *Intellectica* 2 (1) (1987) 114–143.

- 1380 [60] G. E. Hinton, R. Zemel, Autoencoders, minimum description length and  
1381 helmholtz free energy, *Advances in neural information processing systems*  
1382 6 (1993).
- 1383 [61] D. P. Kingma, M. Welling, Auto-encoding variational bayes, arXiv preprint  
1384 arXiv:1312.6114 (2013).
- 1385 [62] C. Villani, *Optimal transport: old and new*, Vol. 338, Springer, 2009.
- 1386 [63] M. Arjovsky, S. Chintala, L. Bottou, Wasserstein generative adversarial  
1387 networks, in: *International conference on machine learning*, PMLR, 2017,  
1388 pp. 214–223.
- 1389 [64] P. K. Rubenstein, B. Schoelkopf, I. Tolstikhin, On the latent space of  
1390 wasserstein auto-encoders, arXiv preprint arXiv:1802.03761 (2018).
- 1391 [65] D. Risso, F. Perraudeau, S. Gribkova, S. Dudoit, J.-P. Vert, A general and  
1392 flexible method for signal extraction from single-cell rna-seq data, *Nature*  
1393 *communications* 9 (1) (2018) 1–17.
- 1394 [66] P. J. Huber, Robust estimation of a location parameter, *Annals Mathemat-*  
1395 *ics Statistics* (1964).
- 1396 [67] A. Gretton, K. M. Borgwardt, M. J. Rasch, B. Schölkopf, A. Smola, A ker-  
1397 nel two-sample test, *Journal of Machine Learning Research* 13 (25) (2012)  
1398 723–773.  
1399 URL <http://jmlr.org/papers/v13/gretton12a.html>
- 1400 [68] D. Misra, Mish: A self regularized non-monotonic activation function,  
1401 arXiv preprint arXiv:1908.08681 (2019).
- 1402 [69] L. Liu, H. Jiang, P. He, W. Chen, X. Liu, J. Gao, J. Han, On the variance  
1403 of the adaptive learning rate and beyond, arXiv preprint arXiv:1908.03265  
1404 (2019).
- 1405 [70] D. P. Kingma, J. Ba, Adam: A method for stochastic optimization, arXiv  
1406 preprint arXiv:1412.6980 (2014).
- 1407 [71] R. Liaw, E. Liang, R. Nishihara, P. Moritz, J. E. Gonzalez, I. Stoica, Tune:  
1408 A research platform for distributed model selection and training, arXiv  
1409 preprint arXiv:1807.05118 (2018).
- 1410 [72] D. Kobak, P. Berens, The art of using t-sne for single-cell transcriptomics,  
1411 *Nature communications* 10 (1) (2019) 1–14.
- 1412 [73] G. C. Linderman, M. Rachh, J. G. Hoskins, S. Steinerberger, Y. Kluger,  
1413 Fast interpolation-based t-sne for improved visualization of single-cell rna-  
1414 seq data, *Nature methods* 16 (3) (2019) 243–245.

- 1415 [74] S. V. Stassen, D. M. Siu, K. C. Lee, J. W. Ho, H. K. So, K. K. Tsia, Parc:  
1416 ultrafast and accurate clustering of phenotypic data of millions of single  
1417 cells, *Bioinformatics* 36 (9) (2020) 2778–2786.
- 1418 [75] A. Subramanian, P. Tamayo, V. K. Mootha, S. Mukherjee, B. L. Ebert,  
1419 M. A. Gillette, A. Paulovich, S. L. Pomeroy, T. R. Golub, E. S. Lander,  
1420 et al., Gene set enrichment analysis: a knowledge-based approach for in-  
1421 terpreting genome-wide expression profiles, *Proceedings of the National*  
1422 *Academy of Sciences* 102 (43) (2005) 15545–15550.
- 1423 [76] E. Y. Chen, C. M. Tan, Y. Kou, Q. Duan, Z. Wang, G. V. Meirelles, N. R.  
1424 Clark, A. Ma’ayan, Enrichr: interactive and collaborative html5 gene list  
1425 enrichment analysis tool, *BMC bioinformatics* 14 (1) (2013) 1–14.
- 1426 [77] J. H. Friedman, Greedy function approximation: a gradient boosting ma-  
1427 chine, *Annals of statistics* (2001) 1189–1232.
- 1428 [78] S. Haghghi, M. Jasemi, S. Hessabi, A. Zolanvari, Pycm: Multiclass con-  
1429 fusion matrix library in python, *Journal of Open Source Software* 3 (25)  
1430 (2018) 729.
